# Supplementary material
Source: ML conference proceedings conference paper supplement (https://proceedings.neurips.cc/paper_files/paper/2017/hash/b19aa25ff58940d974234b48391b9549-Abstract.html)
Supplement: Supplementary file [file b19aa25ff58940d974234b48391b9549-Supplemental.zip]

---

# Improving the Expected Improvement Algorithm

---

**Chao Qin**

Columbia Business School  
New York, NY 10027  
cqin22@gsb.columbia.edu

**Diego Klabjan**

Northwestern University  
Evanston, IL 60208  
d-klabjan@northwestern.edu

**Daniel Russo**

Columbia Business School  
New York, NY 10027  
djr2174@gsb.columbia.edu

## Abstract

The expected improvement (EI) algorithm is a popular strategy for information collection in optimization under uncertainty. The algorithm is widely known to be too greedy, but nevertheless enjoys wide use due to its simplicity and ability to handle uncertainty and noise in a coherent decision theoretic framework. To provide rigorous insight into EI, we study its properties in a simple setting of Bayesian optimization where the domain consists of a finite grid of points. This is the so-called best-arm identification problem, where the goal is to allocate measurement effort wisely to confidently identify the best arm using a small number of measurements. In this framework, one can show formally that EI is far from optimal. To overcome this shortcoming, we introduce a simple modification of the expected improvement algorithm. Surprisingly, this simple change results in an algorithm that is asymptotically optimal for Gaussian best-arm identification problems, and provably outperforms standard EI by an order of magnitude.

## 1 Introduction

Recently Bayesian optimization has received much attention in the machine learning community [26]. This literature studies the problem of maximizing an unknown black-box objective function by collecting noisy measurements of the function at carefully chosen sample points. At first a prior belief over the objective function is prescribed, and then the statistical model is refined sequentially as data are observed. *Expected improvement (EI)* [16] is one of the most widely-used Bayesian optimization algorithms. It is a greedy improvement-based heuristic that samples the point offering greatest expected improvement over the current best sampled point. EI is simple and readily implementable, and it offers reasonable performance in practice.

Although EI is reasonably effective, it is too greedy, focusing nearly all sampling effort near the estimated optimum and gathering too little information about other regions in the domain. This phenomenon is most transparent in the simplest setting of Bayesian optimization where the function's domain is a finite grid of points. This is the problem of best-arm identification (BAI) [2] in a multi-armed bandit. The player sequentially selects arms to measure and observes noisy reward samples with the hope that a small number of measurements enable a confident identification of the best arm. Recently Ryzhov [25] studied the performance of EI in this setting. His work focuses on a link between EI and another algorithm known as the optimal computing budget allocation [5], but his analysis reveals EI allocates a vanishing proportion of samples to suboptimal arms as the total number of samples grows. Any method with this property will be far from optimal in BAI problems [2].

In this paper, we improve the EI algorithm dramatically through a simple modification. The resulting algorithm, which we call *top-two expected improvement* (TTEI), combines the top-two sampling idea of Russo [24] with a careful change to the improvement-measure used by EI. We show that this simple variant of EI achieves strong asymptotic optimality properties in the BAI problem, and benchmark the algorithm in simulation experiments.

Our main theoretical contribution is a complete characterization of the asymptotic proportion of samples TTEI allocates to each arm as a function of the true (unknown) arm means. These particular sampling proportions have been shown to be optimal from several perspectives [6, 15, 12, 24, 11], and this enables us to establish two different optimality results for TTEI. The first concerns the rate at which the algorithm gains confidence about the identity of the optimal arm as the total number of samples collected grows. Next we study the so-called fixed confidence setting, where the algorithm is able to stop at any point and return an estimate of the optimal arm. We show that when applied with the stopping rule of Garivier and Kaufmann [11], TTEI essentially minimizes the expected number of samples required among all rules obeying a constraint on the probability of incorrect selection.

One undesirable feature of our algorithm is its dependence on a tuning parameter. Our theoretical results precisely show the impact of this parameter, and reveal a surprising degree of robustness to its value. It is also easy to design methods that adapt this parameter over time to the optimal value, and we explore one such method in simulation. Still, removing this tuning parameter is an interesting direction for future research.

**Further related literature.** Despite the popularity of EI, its theoretical properties are not well studied. A notable exception is the work of Bull [4], who studies a global optimization problem and provides a convergence rate for EI’s expected loss. However, it is assumed that the observations are noiseless. Our work also relates to a large number of recent machine learning papers that try to characterize the sample complexity of the best-arm identification problem [8, 22, 2, 10, 18, 13, 14, 19–21]. Despite substantial progress, matching asymptotic upper and lower bounds remained elusive in this line of work. Building on older work in statistics [6, 15] and simulation optimization [12], recent work of Garivier and Kaufmann [11] and Russo [24] characterized the optimal sampling proportions. Two notions of asymptotic optimality are established: *sample complexity in the fixed confidence setting* and *rate of posterior convergence*. Garivier and Kaufmann [11] developed two sampling rules designed to closely track the asymptotic optimal proportions and showed that, when combined with a stopping rule motivated by Chernoff [6], this sampling rule minimizes the expected number of samples required to guarantee a vanishing threshold on the probability of incorrect selection is satisfied. Russo [24] independently proposed three simple Bayesian algorithms, and proved that each algorithm attains the optimal rate of posterior convergence. TTEI proposed in this paper is conceptually most similar to the top-two value sampling of Russo [24], but it is more computationally efficient.

## 1.1 Main Contributions

As discussed below, our work makes both theoretical and algorithmic contributions.

**Theoretical:** Our main theoretical contribution is Theorem 1, which establishes that TTEI—a simple modification to a popular Bayesian heuristic—converges to the known optimal asymptotic sampling proportions. It is worth emphasizing that, unlike recent results for other top-two sampling algorithms [24], this theorem establishes that the expected time to converge to the optimal proportions is finite, which we need to establish optimality in the fixed confidence setting. Proving this result required substantial technical innovations. Theorems 2 and 3 are additional theoretical contributions. These mirror results in [24] and [11], but we extract minimal conditions on sampling rules that are sufficient to guarantee the two notions of optimality studied in these papers.

**Algorithmic:** On the algorithmic side, we substantially improve a widely used algorithm. TTEI can be easily implemented by modifying existing EI code, but, as shown in our experiments, can offer an order of magnitude improvement. A more subtle point involves the advantages of TTEI over algorithms that are designed to directly target convergence on the asymptotically optimal proportions. In the experiments, we show that TTEI substantially *outperforms an oracle sampling rule* whose sampling proportions directly track the asymptotically optimal proportions. This phenomenon should be explored further in future work, but suggests that

by carefully reasoning about the value of information TTEI accounts for important factors that are washed out in asymptotic analysis. Finally—as discussed in the conclusion—although we focus on uncorrelated priors we believe our method can be easily extended to more complicated problems like that of best-arm identification in linear bandits [27].

## 2 Problem Formulation

Let  $A = \{1, \dots, k\}$  be the set of arms. At each time  $n \in \mathbb{N} = \{0, 1, 2, \dots\}$ , an arm  $I_n \in A$  is measured, and an independent noisy reward  $Y_{n,I_n}$  is observed. The reward  $Y_{n,i} \in \mathbb{R}$  of arm  $i$  at time  $n$  follows a normal distribution  $N(\mu_i, \sigma^2)$  with common known variance  $\sigma^2$ , but unknown mean  $\mu_i$ . The objective is to allocate measurement effort wisely in order to confidently identify the arm with highest mean using a small number of measurements. We assume that  $\mu_1 > \mu_2 > \dots > \mu_k$ . Our analysis takes place in a *frequentist setting*, in which the true means  $(\mu_1, \dots, \mu_k)$  are fixed but unknown. The algorithms we study, however, are Bayesian in the sense that they begin with prior over the arm means and update the belief to form a posterior distribution as evidence is gathered.

**Prior and Posterior Distributions.** The sampling rules studied in this paper begin with a normally distributed prior over the true mean of each arm  $i \in A$  denoted by  $N(\mu_{0,i}, \sigma_{0,i}^2)$ , and update this to form a posterior distribution as observations are gathered. By conjugacy, the posterior distribution after observing the sequence  $(I_0, Y_{0,I_0}, \dots, I_{n-1}, Y_{n-1,I_{n-1}})$  is also a normal distribution denoted by  $N(\mu_{n,i}, \sigma_{n,i}^2)$ . The posterior mean and variance can be calculated using the following recursive equations:

$$\mu_{n+1,i} = \begin{cases} (\sigma_{n,i}^{-2} \mu_{n,i} + \sigma^{-2} Y_{n,i}) / (\sigma_{n,i}^{-2} + \sigma^{-2}) & \text{if } I_n = i, \\ \mu_{n,i}, & \text{if } I_n \neq i, \end{cases}$$

and

$$\sigma_{n+1,i}^2 = \begin{cases} 1/(\sigma_{n,i}^{-2} + \sigma^{-2}) & \text{if } I_n = i, \\ \sigma_{n,i}^2, & \text{if } I_n \neq i. \end{cases}$$

We denote the posterior distribution over the vector of arm means by

$$\Pi_n = N(\mu_{n,1}, \sigma_{n,1}^2) \otimes N(\mu_{n,2}, \sigma_{n,2}^2) \otimes \dots \otimes N(\mu_{n,k}, \sigma_{n,k}^2)$$

and let  $\theta = (\theta_1, \dots, \theta_k)$ . For example, with this notation

$$\mathbb{E}_{\theta \sim \Pi_n} \left[ \sum_{i \in A} \theta_i \right] = \sum_{i \in A} \mu_{n,i}.$$

The posterior probability assigned to the event that arm  $i$  is optimal is

$$\alpha_{n,i} \triangleq \mathbb{P}_{\theta \sim \Pi_n} \left( \theta_i > \max_{j \neq i} \theta_j \right). \quad (1)$$

To avoid confusion, we always use  $\theta = (\theta_1, \dots, \theta_k)$  to denote a random vector of arm means drawn from the algorithm's posterior  $\Pi_n$ , and  $\mu = (\mu_1, \dots, \mu_k)$  to denote the vector of true arm means.

**Two notions of asymptotic optimality.** Our first notion of optimality relates to the rate of posterior convergence. As the number of observations grows, one hopes that the posterior distribution definitively identifies the true best arm, in the sense that the posterior probability  $1 - \alpha_{n,1}$  assigned by the event that a different arm is optimal tends to zero. By sampling the arms intelligently, we hope this probability can be driven to zero as rapidly as possible. Following Russo [24], we aim to maximize the exponent governing the rate of decay,

$$\liminf_{n \rightarrow \infty} -\frac{1}{n} \log(1 - \alpha_{n,1}),$$

among all sampling rules.

The second setting we consider is often called the “fixed confidence” setting. Here, the agent is allowed at any point to stop gathering samples and return an estimate of the identity of the optimal. In addition to a sampling rule, we require a stopping rule that selects a time  $\tau$  at which to stop, and

a decision rule that returns an estimate  $\hat{I}_\tau$  of the optimal arm based on the first  $\tau$  observations. We consider minimizing the average number of observations  $\mathbb{E}[\tau_\delta]$  required by an algorithm (that consists of a sampling rule, a stopping rule and a decision rule) guaranteeing a vanishing probability  $\delta$  of incorrect identification, i.e.,  $\mathbb{P}(\hat{I}_{\tau_\delta} \neq 1) \leq \delta$ . Following Garivier and Kaufmann [11], the number of samples required scales with  $\log(1/\delta)$ , and so we aim to minimize

$$\limsup_{\delta \rightarrow 0} \frac{\mathbb{E}[\tau_\delta]}{\log(1/\delta)}$$

among all algorithms with probability of error no more than  $\delta$ . In this setting, we study the performance of sampling rules when combined with the stopping rule studied by Chernoff [6] and Garivier and Kaufmann [11].

### 3 Sampling Rules

In this section, we first introduce the expected improvement algorithm, and point out its weakness. Then a simple variant of the expected improvement algorithm is proposed. Both algorithms make calculations using function  $f(x) = x\Phi(x) + \phi(x)$  where  $\Phi(\cdot)$  and  $\phi(\cdot)$  are the CDF and PDF of the standard normal distribution. One can show that as  $x \rightarrow \infty$ ,  $\log f(-x) \sim -x^2/2$ , and so  $f(-x) \approx e^{-x^2/2}$  for very large  $x$ . One can also show that  $f$  is an increasing function.

**Expected Improvement.** *Expected improvement* [16] is a simple improvement-based sampling rule. The EI algorithm favors the arm that offers the largest amount of improvement upon a target. The EI algorithm measures the arm  $I_n = \arg \max_{i \in A} v_{n,i}$  where  $v_{n,i}$  is the EI value of arm  $i$  at time  $n$ . Let  $I_n^* = \arg \max_{i \in A} \mu_{n,i}$  denote the arm with largest posterior mean at time  $n$ . The EI value of arm  $i$  at time  $n$  is defined as

$$v_{n,i} \triangleq \mathbb{E}_{\theta \sim \Pi_n} \left[ (\theta_i - \mu_{n,I_n^*})^+ \right].$$

where  $x^+ = \max\{x, 0\}$ . The above expectation can be computed analytically as follows,

$$v_{n,i} = (\mu_{n,i} - \mu_{n,I_n^*}) \Phi \left( \frac{\mu_{n,i} - \mu_{n,I_n^*}}{\sigma_{n,i}} \right) + \sigma_{n,i} \phi \left( \frac{\mu_{n,i} - \mu_{n,I_n^*}}{\sigma_{n,i}} \right) = \sigma_{n,i} f \left( \frac{\mu_{n,i} - \mu_{n,I_n^*}}{\sigma_{n,i}} \right).$$

The EI value  $v_{n,i}$  measures the potential of arm  $i$  to improve upon the largest posterior mean  $\mu_{n,I_n^*}$  at time  $n$ . Because  $f$  is an increasing function,  $v_{n,i}$  is increasing in both the posterior mean  $\mu_{n,i}$  and posterior standard deviation  $\sigma_{n,i}$ .

**Top-Two Expected Improvement.** The EI algorithm can have very poor performance for selecting the best arm. Once the posterior indicates a particular arm is the best with reasonably high probability, EI allocates nearly all future samples to this arm at the expense of measuring other arms. Recently Ryzhov [25] showed that EI only allocates  $\mathcal{O}(\log n)$  samples to suboptimal arms asymptotically. This is a severe shortcoming, as it means  $n$  must be extremely large before the algorithm has enough samples from suboptimal arms to reach a confident conclusion.

To improve the EI algorithm, we build on the top-two sampling idea in Russo [24]. The idea is to identify in each period the two “most promising” arms based on current observations, and randomize to choose which to sample. A tuning parameter  $\beta \in (0, 1)$  controls the probability assigned to the “top” arm. A naive top-two variant of EI would identify the two arms with largest EI value, and flip a  $\beta$ -weighted coin to decide which to measure. However, one can prove that this algorithm is not optimal for any choice of  $\beta$ . Instead, what we call the top-two expected improvement algorithm uses a novel modified EI criterion which more carefully accounts for the decision-maker’s uncertainty when deciding which arm to sample.

For  $i, j \in A$ , define  $v_{n,i,j} \triangleq \mathbb{E}_{\theta \sim \Pi_n} [(\theta_i - \theta_j)^+]$ . This measures the expected magnitude of improvement arm  $i$  offers over arm  $j$ , but unlike the typical EI criterion, this expectation integrates over the uncertain quality of *both arms*. This measure can be computed analytically as

$$v_{n,i,j} = \sqrt{\sigma_{n,i}^2 + \sigma_{n,j}^2} f \left( \frac{\mu_{n,i} - \mu_{n,j}}{\sqrt{\sigma_{n,i}^2 + \sigma_{n,j}^2}} \right).$$

TTEI depends on a tuning parameter  $\beta > 0$ , set to  $1/2$  by default. With probability  $\beta$ , TTEI measures the arm  $I_n^{(1)}$  by optimizing the EI criterion, and otherwise it measures an alternative  $I_n^{(2)}$  that offers the largest expected improvement on the arm  $I_n^{(1)}$ . Formally, TTEI measures the arm

$$I_n = \begin{cases} I_n^{(1)} = \arg \max_{i \in A} v_{n,i}, & \text{with probability } \beta, \\ I_n^{(2)} = \arg \max_{i \in A} v_{n,i, I_n^{(1)}}, & \text{with probability } 1 - \beta. \end{cases}$$

Note that  $v_{n,i,i} = 0$ , which implies  $I_n^{(2)} \neq I_n^{(1)}$ .

We notice that TTEI with  $\beta = 1$  is the standard EI algorithm. Comparing to the EI algorithm, TTEI with  $\beta \in (0, 1)$  allocates much more measurement effort to suboptimal arms. We will see that TTEI allocates  $\beta$  proportion of samples to the best arm asymptotically, and it uses the remaining  $1 - \beta$  fraction of samples for gathering evidence against each suboptimal arm.

#### 4 Convergence to Asymptotically Optimal Proportions

For all  $i \in A$  and  $n \in \mathbb{N}$ , we define  $T_{n,i} \triangleq \sum_{\ell=0}^{n-1} \mathbf{1}\{I_\ell = i\}$  to be the number of samples of arm  $i$  before time  $n$ . We will show that under TTEI with parameter  $\beta$ ,  $\lim_{n \rightarrow \infty} T_{n,1}/n = \beta$ . That is, the algorithm asymptotically allocates  $\beta$  proportion of the samples to true best arm. Dropping for the moment questions regarding the impact of this tuning parameter, let us consider the optimal asymptotic proportion of effort to allocate to each of the  $k - 1$  remaining arms. It is known that the optimal proportions are given by the unique vector  $(w_2^\beta, \dots, w_k^\beta)$  satisfying  $\sum_{i=2}^k w_i^\beta = 1 - \beta$  and

$$\frac{(\mu_1 - \mu_2)^2}{1/\beta + 1/w_2^\beta} = \dots = \frac{(\mu_1 - \mu_k)^2}{1/\beta + 1/w_k^\beta}. \quad (2)$$

We set  $w_1^\beta = \beta$ , so  $w^\beta = (w_1^\beta, \dots, w_k^\beta)$  encodes the sampling proportions of each arm.

To understand the source of equation (2), imagine that over the first  $n$  periods each arm  $i$  is sampled exactly  $w_i^\beta n$  times, and let  $\hat{\mu}_{n,i} \sim N(\mu_i, \frac{\sigma^2}{w_i^\beta n})$  denote the empirical mean of arm  $i$ . Then

$$\hat{\mu}_{n,1} - \hat{\mu}_{n,i} \sim N(\mu_1 - \mu_i, \tilde{\sigma}_i^2) \quad \text{where} \quad \tilde{\sigma}_i^2 = \frac{\sigma^2}{n} \left( \frac{1}{\beta} + \frac{1}{w_i^\beta} \right).$$

The probability  $\hat{\mu}_{n,1} - \hat{\mu}_{n,i} \leq 0$ —leading to an incorrect estimate of which arm has highest mean—is  $\Phi((\mu_i - \mu_1)/\tilde{\sigma}_i)$  where  $\Phi$  is the CDF of the standard normal distribution. Equation (2) is equivalent to requiring  $(\mu_i - \mu_1)/\tilde{\sigma}_i$  is equal for all arms  $i$ , so the probability of falsely declaring  $\mu_i \geq \mu_1$  is equal for all  $i \neq 1$ . In a sense, these sampling frequencies equalize the evidence against each suboptimal arm. These proportions appeared first in the machine learning literature in [24, 11], but appeared much earlier in the statistics literature in [15], and separately in the simulation optimization literature in [12]. As we will see in the next section, convergence to this allocation is a necessary condition for both notions of optimality considered in this paper.

Our main theoretical contribution is the following theorem, which establishes that under TTEI sampling proportions converge to the proportions  $w^\beta$  derived above. Therefore, while the sampling proportion of the optimal arm is controlled by the tuning parameter  $\beta$ , the remaining  $1 - \beta$  fraction of measurement is optimally distributed among the remaining  $k - 1$  arms. Such a result was established for other top-two sampling algorithms in [24]. The second notion of optimality requires not just convergence to  $w^\beta$  with probability 1, but also a sense in which the expected time until convergence is finite. The following theorem presents such a stronger result for TTEI. To make this precise, we introduce a time after which for each arm, the empirical proportion allocated to it is accurate. Specifically, given  $\beta \in (0, 1)$  and  $\epsilon > 0$ , we define

$$M_\beta^\epsilon \triangleq \inf \left\{ N \in \mathbb{N} : \max_{i \in A} |T_{n,i}/n - w_i^\beta| \leq \epsilon \quad \forall n \geq N \right\}. \quad (3)$$

It is clear that  $\mathbb{P}(M_\beta^\epsilon < \infty) = 1$  for all  $\epsilon > 0$  if and only if  $T_{n,i}/n \rightarrow w_i^\beta$  with probability 1 for each arm  $i \in A$ . To establish optimality in the “fixed confidence setting”, we need to prove in addition that  $\mathbb{E}[M_\beta^\epsilon] < \infty$  for all  $\epsilon > 0$ , which requires substantial new technical innovations.

**Theorem 1.** Under TTEI with parameter  $\beta \in (0, 1)$ ,  $\mathbb{E}[M_\beta^\epsilon] < \infty$  for any  $\epsilon > 0$ .

This result implies that under TTEI,  $\mathbb{P}(M_\beta^\epsilon < \infty) = 1$  for all  $\epsilon > 0$ , or equivalently

$$\lim_{n \rightarrow \infty} \frac{T_{n,i}}{n} = w_i^\beta \quad \forall i \in A.$$

#### 4.1 Problem Complexity Measure

Given  $\beta \in (0, 1)$ , define the problem complexity measure

$$\Gamma_\beta^* \triangleq \frac{(\mu_1 - \mu_2)^2}{2\sigma^2 \left(1/\beta + 1/w_2^\beta\right)} = \dots = \frac{(\mu_1 - \mu_k)^2}{2\sigma^2 \left(1/\beta + 1/w_k^\beta\right)},$$

which is a function of the true arm means and variances. This will be the exponent governing the rate of posterior convergence, and also characterizing the average number of samples in the fixed confidence setting. The optimal exponent comes from maximizing over  $\beta$ . Let us define  $\Gamma^* = \max_{\beta \in (0,1)} \Gamma_\beta^*$  and  $\beta^* = \arg \max_{\beta \in (0,1)} \Gamma_\beta^*$  and set

$$w^* = w^{\beta^*} = (\beta^*, w_2^{\beta^*}, \dots, w_k^{\beta^*}).$$

Russo [24] has proved that for  $\beta \in (0, 1)$ ,  $\Gamma_\beta^* \geq \Gamma^* / \max\left\{\frac{\beta^*}{\beta}, \frac{1-\beta^*}{1-\beta}\right\}$ , and therefore  $\Gamma_{1/2}^* \geq \Gamma^*/2$ . This demonstrates a surprising degree of robustness to  $\beta$ . In particular,  $\Gamma_\beta$  is close to  $\Gamma^*$  if  $\beta$  is adjusted to be close to  $\beta^*$ , and the choice of  $\beta = 1/2$  always yields a 2-approximation to  $\Gamma^*$ .

### 5 Implied Optimality Results

This section establishes formal optimality guarantees for TTEI. Both results, in fact, hold for any algorithm satisfying the conclusions of Theorem 1, and are therefore of broader interest.

#### 5.1 Optimal Rate of Posterior Convergence

We first provide upper and lower bounds on the exponent governing the rate of posterior convergence. The same result has been proved in Russo [24] for bounded correlated priors. We use different proof techniques to prove the following result for uncorrelated Gaussian priors.

This theorem shows that no algorithm can attain a rate of posterior convergence faster than  $e^{-\Gamma^* n}$  and that this is attained by any algorithm that, like TTEI with optimal tuning parameter  $\beta^*$ , has asymptotic sampling ratios  $(w_1^*, \dots, w_k^*)$ . The second part implies TTEI with parameter  $\beta$  attains convergence rate  $e^{-n\Gamma_\beta^*}$  and that it is optimal among sampling rules that allocation  $\beta$ -fraction of samples to the optimal arm. Recall that, without loss of generality, we have assumed arm 1 is the arm with true highest mean  $\mu_1 = \max_{i \in A} \mu_i$ . We will study the posterior mass  $1 - \alpha_{n,1}$  assigned to the event that some other has the highest mean.

**Theorem 2** (Posterior Convergence - Sufficient Condition for Optimality). *The following properties hold with probability 1:*

1. Under any sampling rule that satisfies  $T_{n,i}/n \rightarrow w_i^*$  for each  $i \in A$ ,

$$\lim_{n \rightarrow \infty} -\frac{1}{n} \log(1 - \alpha_{n,1}) = \Gamma^*.$$

Under any sampling rule,

$$\limsup_{n \rightarrow \infty} -\frac{1}{n} \log(1 - \alpha_{n,1}) \leq \Gamma^*.$$

2. Let  $\beta \in (0, 1)$ . Under any sampling rule that satisfies  $T_{n,i}/n \rightarrow w_i^\beta$  for each  $i \in A$ ,

$$\lim_{n \rightarrow \infty} -\frac{1}{n} \log(1 - \alpha_{n,1}) = \Gamma_\beta^*.$$

Under any sampling rule that satisfies  $T_{n,1}/n \rightarrow \beta$ ,

$$\limsup_{n \rightarrow \infty} -\frac{1}{n} \log(1 - \alpha_{n,1}) \leq \Gamma_{\beta}^*.$$

This result reveals that when the tuning parameter  $\beta$  is set optimally to  $\beta^*$ , TTEI attains the optimal rate of posterior convergence. Since  $\Gamma_{1/2}^* \geq \Gamma^*/2$ , when  $\beta$  is set to the default value  $1/2$ , the exponent governing the convergence rate of TTEI is at least half of the optimal one.

## 5.2 Optimal Average Sample Size

**Chernoff's Stopping Rule.** In the fixed confidence setting, besides an efficient sampling rule, a player also needs to design an intelligent stopping rule. This section introduces a stopping rule proposed by Chernoff [6] and studied recently by Garivier and Kaufmann [11]. This stopping rule makes use of the Generalized Likelihood Ratio statistic, which depends on the current maximum likelihood estimates of all unknown means. For each arm  $i \in A$ , the maximum likelihood estimate of its unknown mean  $\mu_i$  at time  $n$  is its empirical mean  $\hat{\mu}_{n,i} = T_{n,i}^{-1} \sum_{\ell=0}^{n-1} \mathbf{1}\{I_{\ell} = i\} Y_{\ell, I_{\ell}}$  where  $T_{n,i} = \sum_{\ell=0}^{n-1} \mathbf{1}\{I_{\ell} = i\}$ . Next we define a weighted average of empirical means of arms  $i, j \in A$ :

$$\hat{\mu}_{n,i,j} \triangleq \frac{T_{n,i}}{T_{n,i} + T_{n,j}} \hat{\mu}_{n,i} + \frac{T_{n,j}}{T_{n,i} + T_{n,j}} \hat{\mu}_{n,j}.$$

Then if  $\hat{\mu}_{n,i} \geq \hat{\mu}_{n,j}$ , the Generalized Likelihood Ratio statistic  $Z_{n,i,j}$  has the following explicit expression:

$$Z_{n,i,j} \triangleq T_{n,i} d(\hat{\mu}_{n,i}, \hat{\mu}_{n,i,j}) + T_{n,j} d(\hat{\mu}_{n,j}, \hat{\mu}_{n,i,j})$$

where  $d(x, y) = (x - y)^2 / (2\sigma^2)$  is the Kullback-Leibler (KL) divergence between Gaussian distributions  $N(x, \sigma^2)$  and  $N(y, \sigma^2)$ . Similarly, if  $\hat{\mu}_{n,i} < \hat{\mu}_{n,j}$ ,  $Z_{n,i,j} = -Z_{n,j,i} \leq 0$  where  $Z_{n,j,i}$  is well defined as above. If either arm has never been sampled before, these quantities are not well defined and we take the convention that  $Z_{n,i,j} = Z_{n,j,i} = 0$ . Given a target confidence  $\delta \in (0, 1)$ , to ensure that one arm is better than the others with probability at least  $1 - \delta$ , we use the stopping time

$$\tau_{\delta} \triangleq \inf \left\{ n \in \mathbb{N} : Z_n \triangleq \max_{i \in A} \min_{j \in A \setminus \{i\}} Z_{n,i,j} > \gamma_{n,\delta} \right\}$$

where  $\gamma_{n,\delta} > 0$  is an appropriate threshold. By definition,  $\min_{j \in A \setminus \{i\}} Z_{n,i,j}$  is nonnegative if and only if  $\hat{\mu}_{n,i} \geq \hat{\mu}_{n,j}$  for all  $j \in A \setminus \{i\}$ . Hence, whenever  $\hat{I}_n^* \triangleq \arg \max_{i \in A} \hat{\mu}_{n,i}$  is unique,  $Z_n = \min_{j \in A \setminus \{\hat{I}_n^*\}} Z_{n,\hat{I}_n^*,j}$ .

Next we introduce the exploration rate for normal bandit models that can ensure to identify the best arm with probability at least  $1 - \delta$ . We use the following result given in Garivier and Kaufmann [11].

**Proposition 1** (Garivier and Kaufmann [11] Proposition 12). *Let  $\delta \in (0, 1)$  and  $\alpha > 1$ . There exists a constant  $C = C(\alpha, k)$  such that under any sampling rule, using the Chernoff's stopping rule with the threshold  $\gamma_{n,\delta}^{\alpha} = \log(Cn^{\alpha}/\delta)$  guarantees*

$$\mathbb{P} \left( \tau_{\delta} < \infty, \arg \max_{i \in A} \hat{\mu}_{\tau_{\delta},i} \neq 1 \right) \leq \delta.$$

**Sample Complexity.** Garivier and Kaufmann [11] recently provided a general lower bound on the number of samples required in the fixed confidence setting. In particular, they show that for any normal bandit model, under any sampling rule and stopping time  $\tau_{\delta}$  that guarantees a probability of error no more than  $\delta$ ,

$$\liminf_{\delta \rightarrow 0} \frac{\mathbb{E}[\tau_{\delta}]}{\log(1/\delta)} \geq \frac{1}{\Gamma^*}.$$

Recall that  $M_{\beta}^{\epsilon}$ , defined in (3), is the first time after which the empirical proportions are within  $\epsilon$  of their asymptotic limits. The next result provides a condition in terms of  $M_{\beta}^{\epsilon}$  that is sufficient to guarantee optimality in the fixed confidence setting.

**Theorem 3** (Fixed Confidence - Sufficient Condition for Optimality). *Let  $\delta, \beta \in (0, 1)$  and  $\alpha > 1$ . Under any sampling rule which, if applied with no stopping rule, satisfies  $\mathbb{E}[M_\beta^\epsilon] < \infty$  for all  $\epsilon > 0$ , using the Chernoff's stopping rule with the threshold  $\gamma_{n,\delta}^\alpha = \log(Cn^\alpha/\delta)$  (where  $C = C(\alpha, k)$ ) guarantees*

$$\limsup_{\delta \rightarrow 0} \frac{\mathbb{E}[\tau_\delta]}{\log(1/\delta)} \leq \frac{1}{\Gamma_\beta^*}.$$

When  $\beta = \beta^*$  the general lower bound on sample complexity of  $1/\Gamma^*$  is essentially matched. In addition, when  $\beta$  is set to the default value  $1/2$ , the sample complexity of TTEI combined with the Chernoff's stopping rule is at most twice the optimal sample complexity since  $1/\Gamma_{1/2}^* \leq 2/\Gamma^*$ .

## 6 Numerical Experiments

To test the empirical performance of TTEI, we conduct several numerical experiments. The first experiment compares the performance of TTEI with  $\beta = 1/2$  and EI. The second experiment compares the performance of different versions of TTEI, top-two Thompson sampling (TTTS) [24], knowledge gradient (KG) [9] and oracle algorithms that know the optimal proportions *a priori*. Each algorithm plays arm  $i = 1, \dots, k$  exactly once at the beginning, and then prescribe a prior  $N(Y_{i,i}, \sigma^2)$  for unknown arm-mean  $\mu_i$  where  $Y_{i,i}$  is the observation from  $N(\mu_i, \sigma^2)$ . In both experiments, we fix the common known variance  $\sigma^2 = 1$  and the number of arms  $k = 5$ . We consider three instances  $[\mu_1, \dots, \mu_5] = [5, 4, 1, 1, 1]$ ,  $[5, 4, 3, 2, 1]$  and  $[2, 0.8, 0.6, 0.4, 0.2]$ . The optimal parameter  $\beta^*$  equals 0.48, 0.45 and 0.35, respectively.

Recall that  $\alpha_{n,i}$ , defined in (1), denotes the posterior probability that arm  $i$  is optimal. Tables 1 and 2 show the average number of measurements required for the largest posterior probability assigned to some arm being the best to reach a given confidence level  $c$ , i.e.,  $\max_i \alpha_{n,i} \geq c$ . In a Bayesian setting, the probability of correct selection under this rule is *exactly*  $c$ . The results in Table 1 are averaged over 100 trials. We see that TTEI with  $\beta = 1/2$  outperforms standard EI by an order of magnitude.

Table 1: Average number of measurements required to reach the confidence level  $c = 0.95$

|                       | TTEI-1/2 | EI      |
|-----------------------|----------|---------|
| $[5, 4, 1, 1, 1]$     | 14.60    | 238.50  |
| $[5, 4, 3, 2, 1]$     | 16.72    | 384.73  |
| $[2, .8, .6, .4, .2]$ | 24.39    | 1525.42 |

The second experiment compares the performance of different versions of TTEI, TTTS, KG, a random sampling oracle (RSO) and a tracking oracle (TO). The random sampling oracle draws a random arm in each round from the distribution  $w^*$  encoding the asymptotically optimal proportions. The tracking oracle tracks the optimal proportions at each round. Specifically, the tracking oracle samples the arm with the largest ratio its optimal and empirical proportions. Two tracking algorithms proposed by Garivier and Kaufmann [11] are similar to this tracking oracle. TTEI with adaptive  $\beta$  (aTTEI) works as follows: it starts with  $\beta = 1/2$  and updates  $\beta = \hat{\beta}^*$  every 10 rounds where  $\hat{\beta}^*$  is the maximizer of equation (2) based on plug-in estimators for the unknown arm-means. Table 2 shows the average number of measurements required for the largest posterior probability being the best to reach the confidence level  $c = 0.9999$ . The results in Table 2 are averaged over 200 trials. We see that the performances of TTEI with adaptive  $\beta$  and TTEI with  $\beta^*$  are better than the performances of all other algorithms. We note that TTEI with adaptive  $\beta$  substantially outperforms the tracking oracle.

Table 2: Average number of measurements required to reach the confidence level  $c = 0.9999$

|                       | TTEI-1/2 | aTTEI        | TTEI- $\beta^*$ | TTTS- $\beta^*$ | RSO    | TO    | KG    |
|-----------------------|----------|--------------|-----------------|-----------------|--------|-------|-------|
| $[5, 4, 1, 1, 1]$     | 61.97    | 61.98        | <b>61.59</b>    | 62.86           | 97.04  | 77.76 | 75.55 |
| $[5, 4, 3, 2, 1]$     | 66.56    | <b>65.54</b> | 65.55           | 66.53           | 103.43 | 88.02 | 81.49 |
| $[2, .8, .6, .4, .2]$ | 76.21    | 72.94        | <b>71.62</b>    | 73.02           | 101.97 | 96.90 | 86.98 |

In addition to the Bayesian stopping rule tested above, we have run some experiments with the Chernoff stopping rule discussed in Section 5.2. Asymptotic analysis shows these two rules are



similar when the confidence level  $c$  is very high. However, the Chernoff stopping rule appears to be too conservative in practice; it typically yields a probability of correct selection much larger than the specified confidence level  $c$  at the expense of using more samples. Since our current focus is on allocation rules, we focus on this Bayesian stopping rule, which appears to offer a more fundamental comparison than one based on ad hoc choice of tuning parameters. Developing improved stopping rules is an important area for future research.

## 7 Conclusion and Extensions to Correlated Arms

We conclude by noting that while this paper thoroughly studies TTEI in the case of uncorrelated priors, we believe the algorithm is also ideally suited to problems with complex correlated priors and large sets of arms. In fact, the modified information measure  $v_{n,i,j}$  was designed with an eye toward dealing with correlation in a sophisticated way. In the case of a correlated normal distribution  $N(\mu, \Sigma)$ , one has

$$v_{n,i,j} = \mathbb{E}_{\theta \sim N(\mu, \Sigma)}[(\theta_i - \theta_j)^+] = \sqrt{\Sigma_{ii} + \Sigma_{jj} - 2\Sigma_{ij}} f\left(\frac{\mu_{n,i} - \mu_{n,j}}{\sqrt{\Sigma_{ii} + \Sigma_{jj} - 2\Sigma_{ij}}}\right).$$

This closed form accommodates efficient computation. Here the term  $\Sigma_{i,j}$  accounts for the correlation or similarity between arms  $i$  and  $j$ . Therefore  $v_{n,i,I_n^{(1)}}$  is large for arms  $i$  that offer large potential improvement over  $I_n^{(1)}$ , i.e. those that (1) have large posterior mean, (2) have large posterior variance, and (3) are not highly correlated with arm  $I_n^{(1)}$ . As  $I_n^{(1)}$  concentrates near the estimated optimum, we expect the third factor will force the algorithm to experiment in promising regions of the domain that are “far” away from the current-estimated optimum, and are under-explored under standard EI.

## References

- [1] Yasin Abbasi-Yadkori, David Pal, and Csaba Szepesvari. Online-to-confidence-set conversions and application to sparse stochastic bandits. In *AISTATS*, volume 22, pages 1–9, 2012.
- [2] Jean-Yves Audibert, Sébastien Bubeck, and Rémi Munos. Best arm identification in multi-armed bandits. In *COLT 2010 - The 23rd Conference on Learning Theory, Haifa, Israel, June 27-29, 2010*, pages 41–53, 2010.
- [3] Stéphane Boucheron, Gábor Lugosi, and Pascal Massart. *Concentration inequalities: A nonasymptotic theory of independence*. Oxford university press, 2013.
- [4] Adam D. Bull. Convergence rates of efficient global optimization algorithms. *Journal of Machine Learning Research*, 12:2879–2904, 2011. URL <http://dblp.uni-trier.de/db/journals/jmlr/jmlr12.html#Bull111>.
- [5] Chun-Hung Chen, Jianwu Lin, Enver Yücesan, and Stephen E Chick. Simulation budget allocation for further enhancing the efficiency of ordinal optimization. *Discrete Event Dynamic Systems*, 10(3):251–270, 2000.
- [6] Herman Chernoff. Sequential design of experiments. *Ann. Math. Statist.*, 30(3):755–770, 09 1959. doi: 10.1214/aoms/1177706205. URL <http://dx.doi.org/10.1214/aoms/1177706205>.
- [7] Amir Dembo and Ofer Zeitouni. Large deviations techniques and applications (1998). *Applications of Mathematics*, 38.
- [8] Eyal Even-dar, Shie Mannor, and Yishay Mansour. Pac bounds for multi-armed bandit and markov decision processes. In *In Fifteenth Annual Conference on Computational Learning Theory (COLT)*, pages 255–270, 2002.
- [9] Peter I Frazier, Warren B Powell, and Savas Dayanik. A knowledge-gradient policy for sequential information collection. *SIAM Journal on Control and Optimization*, 47(5):2410–2439, 2008.
- [10] Victor Gabillon, Mohammad Ghavamzadeh, and Alessandro Lazaric. Best arm identification: A unified approach to fixed budget and fixed confidence. In F. Pereira, C. J. C. Burges, L. Bottou, and K. Q. Weinberger, editors, *Advances in Neural Information Processing Systems 25*, pages 3212–3220. Curran Associates, Inc., 2012.
- [11] Aurélien Garivier and Emilie Kaufmann. Optimal best arm identification with fixed confidence. In *Proceedings of the 29th Conference on Learning Theory, COLT 2016, New York, USA, June 23-26, 2016*, pages 998–1027, 2016.
- [12] P. Glynn and S. Juneja. A large deviations perspective on ordinal optimization. In *Simulation Conference, 2004. Proceedings of the 2004 Winter*, volume 1. IEEE, 2004.
- [13] Kevin Jamieson, Matthew Malloy, Robert Nowak, and Sébastien Bubeck. lil’ ucb : An optimal exploration algorithm for multi-armed bandits. In Maria Florina Balcan, Vitaly Feldman, and Csaba Szepesvári, editors, *Proceedings of The 27th Conference on Learning Theory*, volume 35 of *Proceedings of Machine Learning Research*, pages 423–439, Barcelona, Spain, 13–15 Jun 2014. PMLR. URL <http://proceedings.mlr.press/v35/jamieson14.html>.
- [14] Kevin G. Jamieson and Robert D. Nowak. Best-arm identification algorithms for multi-armed bandits in the fixed confidence setting. In *48th Annual Conference on Information Sciences and Systems, CISS 2014, Princeton, NJ, USA, March 19-21, 2014*, pages 1–6, 2014.
- [15] C. Jennison, I. M. Johnstone, and B. W. Turnbull. Asymptotically optimal procedures for sequential adaptive selection of the best of several normal means. *Statistical decision theory and related topics III*, 2:55–86, 1982.
- [16] Donald R. Jones, Matthias Schonlau, and William J. Welch. Efficient global optimization of expensive black-box functions. *Journal of Global Optimization*, 13(4):455–492, 1998. ISSN 1573-2916. doi: 10.1023/A:1008306431147. URL <http://dx.doi.org/10.1023/A:1008306431147>.

- [17] Sham Kakade. Stat 928 lecture notes: Lecture 4, 2011. URL <http://stat.wharton.upenn.edu/~skakade/courses/stat928/lectures/lecture04.pdf>.
- [18] Zohar Karnin, Tomer Koren, and Oren Somekh. Almost optimal exploration in multi-armed bandits. In Sanjoy Dasgupta and David McAllester, editors, *Proceedings of the 30th International Conference on Machine Learning*, volume 28 of *Proceedings of Machine Learning Research*, pages 1238–1246, Atlanta, Georgia, USA, 17–19 Jun 2013. PMLR. URL <http://proceedings.mlr.press/v28/karnin13.html>.
- [19] Emilie Kaufmann and Shivaram Kalyanakrishnan. Information complexity in bandit subset selection. In Shai Shalev-Shwartz and Ingo Steinwart, editors, *Proceedings of the 26th Annual Conference on Learning Theory*, volume 30 of *Proceedings of Machine Learning Research*, pages 228–251, Princeton, NJ, USA, 12–14 Jun 2013. PMLR. URL <http://proceedings.mlr.press/v30/Kaufmann13.html>.
- [20] Emilie Kaufmann, Olivier Cappé, and Aurélien Garivier. On the complexity of a/b testing. In Maria Florina Balcan, Vitaly Feldman, and Csaba Szepesvári, editors, *Proceedings of The 27th Conference on Learning Theory*, volume 35 of *Proceedings of Machine Learning Research*, pages 461–481, Barcelona, Spain, 13–15 Jun 2014. PMLR. URL <http://proceedings.mlr.press/v35/kaufmann14.html>.
- [21] Emilie Kaufmann, Olivier Cappé, and Aurélien Garivier. On the complexity of best-arm identification in multi-armed bandit models. *Journal of Machine Learning Research*, 17(1): 1–42, 2016. URL <http://jmlr.org/papers/v17/kaufman16a.html>.
- [22] Shie Mannor, John N. Tsitsiklis, Kristin Bennett, and Nicolò Cesa-bianchi. The sample complexity of exploration in the multi-armed bandit problem. *Journal of Machine Learning Research*, 5:2004, 2004.
- [23] Victor H Peña, Tze Leung Lai, and Qi-Man Shao. *Self-normalized processes: Limit theory and Statistical Applications*. Springer Science & Business Media, 2008.
- [24] Daniel Russo. Simple bayesian algorithms for best arm identification. In *29th Annual Conference on Learning Theory*, pages 1417–1418, 2016.
- [25] Ilya O. Ryzhov. On the convergence rates of expected improvement methods. *Operations Research*, 64(6):1515–1528, 2016. doi: 10.1287/opre.2016.1494. URL <http://dx.doi.org/10.1287/opre.2016.1494>.
- [26] Bobak Shahriari, Kevin Swersky, Ziyu Wang, Ryan P. Adams, and Nando de Freitas. Taking the human out of the loop: A review of Bayesian optimization. *Proceedings of the IEEE*, 104(1): 148–175, 2016. doi: 10.1109/JPROC.2015.2494218. URL <http://dx.doi.org/10.1109/JPROC.2015.2494218>.
- [27] Marta Soare, Alessandro Lazaric, and Rémi Munos. Best-arm identification in linear bandits. In *Advances in Neural Information Processing Systems*, pages 828–836, 2014.

## A Notation

We now introduce some important notation that will be used throughout the proof. First, recall we use the notation  $\mu_{n,i}$  for the posterior mean of arm  $i$ , and  $\hat{\mu}_{n,i}$  for the empirical mean. The empirical mean is only well defined when  $T_{n,i} > 0$ , which potentially requires us qualify throughout entire proof that equations are only defined under such circumstances. To avoid this, we take the convention that  $\hat{\mu}_{n,i} = 0$  when  $T_{n,i} = 0$ . The default choice of 0 for the mean is unimportant.

The top two arms identified by TTEI at time  $n$  are denote by  $I_n^{(1)}$  and  $I_n^{(2)}$ . We let  $I_n^* = \arg \max_{i \in A} \mu_{n,i}$  denote the arm with highest posterior mean and  $\hat{I}_n = \arg \max_{i \in A} \hat{\mu}_{n,i}$  denote the arm with highest empirical mean. For much of the proof,  $\hat{I}_n^* = I_n^*$ , in which case the distinction between these two notations is unimportant.

Next, we define

$$\beta_{\min} \triangleq \min\{\beta, 1 - \beta\} \quad \text{and} \quad \beta_{\max} \triangleq \max\{\beta, 1 - \beta\}$$

and

$$\Delta_{\min} \triangleq \min_{i \neq j} |\mu_i - \mu_j| \quad \text{and} \quad \Delta_{\max} \triangleq \max_{i,j \in A} (\mu_i - \mu_j).$$

Since  $\beta \in (0, 1)$ ,  $0 < \beta_{\min} \leq \beta_{\max} < 1$ . Because of the assumption that the arm means are unique, we have  $\Delta_{\min}, \Delta_{\max} > 0$ .

There are two sources of randomness in our problem: the randomness in the observation noise, and the randomness in action selection due to the stochastic nature of the TTEI policy. We introduce two variables  $W_1$  and  $W_2$ , which bound the maximum impact of this randomness. First, define the random variable

$$W_1 \triangleq \max_{n \in \mathbb{N}} \max_{i \in A} \sqrt{\frac{T_{n,i} + 1}{\log(e + T_{n,i})}} \left| \frac{\hat{\mu}_{n,i} - \mu_i}{\sigma} \right|. \quad (4)$$

Ignoring logarithmic factors, for any sample path  $\left| \frac{\hat{\mu}_{n,i} - \mu_i}{\sigma} \right|$  is bounded by a term of order  $W_1 / \sqrt{T_{n,i}}$ . Note that the term  $1/\sqrt{T_{n,i}}$  is what would be expected by the central limit theorem.

The second source of randomness is due to the stochastic nature of TTEI. For all  $i \in A$  and  $n \in \mathbb{N}$ , define

$$\psi_{n,i} \triangleq \mathbb{P}(I_n = i | \mathcal{F}_n) \quad \text{and} \quad \Psi_{n,i} \triangleq \sum_{\ell=0}^{n-1} \psi_{\ell,i}.$$

where

$$\mathcal{F}_n = \sigma(I_0, Y_{0,I_0}, \dots, I_{n-1}, Y_{n-1,I_{n-1}})$$

is the  $\sigma$ -algebra generated by observations before time  $n$ . Note that for all  $i \in A$ ,  $T_{0,i} = \Psi_{0,i} = 0$ . Both  $T_{n,i}$  and  $\Psi_{n,i}$  measure the effort allocated to arm  $i$  before time  $n$ . Next we introduce the second sample-path dependent variable  $W_2$  that measures the difference between two measurements of effort under TTEI. Define

$$W_2 \triangleq \max_{n \in \mathbb{N}} \max_{i \in A} \frac{|T_{n,i} - \Psi_{n,i}|}{\sqrt{(1 + \Psi_{n,i}/\beta_{\min}) \log(e^2 + \Psi_{n,i}/\beta_{\min})}}. \quad (5)$$

Ignoring constants and logarithmic terms, for any sample path  $|T_{n,i} - \Psi_{n,i}|$  is bounded by a term of order  $W_2 / \sqrt{\Psi_{n,i}}$ .

Our main results require bounding the expected time for certain events to occur under TTEI. The proof strategy is to bound these times for any sample path in terms of the maximal deviations  $W_1$  and  $W_2$ . We can then appeal to concentration results for  $W_1$  and  $W_2$  that are established in Section C.

A final piece of important notation pertains to an alternative to the random time  $M_\beta^\epsilon$  defined in equation (3) in Section 4. It will often be more convenient to work with the time

$$N_\beta^\epsilon \triangleq \inf \left\{ N \in \mathbb{N} : \max_{i \in A} |\hat{\mu}_{n,i} - \mu_i| \leq \epsilon \text{ and } \max_{i \in A} |T_{n,i}/n - w_i^\beta| \leq \epsilon \quad \forall n \geq N \right\} \quad (6)$$

after which both the sampling proportions and estimated arm means are close to their asymptotic limits.

## B Proof Outline

The remainder of the appendix is organized as follows.

1. Section C provides some basic tail bounds for Gaussian distributions and the expected improvement measure. The section then shows that all moments of the random variables  $W_1$  and  $W_2$  are finite. A final part looks at the sufficient condition given in Theorem 3, and shows this condition implies the existence of a time after which the estimated mean of each arm is accurate within any fixed tolerance.
2. Section D provides the proof of Theorem 2, establishing that convergence of sampling proportions to some fixed optimal proportions guarantees the optimal rate of posterior convergence.
3. Section E provides the proof of Theorem 3, a sufficient condition under which optimality in the fixed confidence setting is achieved.
4. Section F proves that TTEI satisfies this sufficient condition for optimality, which immediately establishes Theorem 1.

## C Concentration and Maximal Inequalities

### C.1 Basic Gaussian Tail Bounds

The following two lemmas are standard results on the tail probabilities of Gaussian distributions. The first tail bound holds for all sub-Gaussian distributions, and is a standard concentration inequality [3].

**Lemma 1.** *Let  $x > 0$ . If  $X \sim N(\mu, \sigma^2)$  then  $\mathbb{P}(X \geq \mu + x) \leq e^{-x^2/(2\sigma^2)}$ .*

The next lemma shows that the exponent in the upper bound above is sharp. That is  $\log \mathbb{P}(X \geq \mu + x) = -\frac{x^2}{2\sigma^2} + o(x)$  as  $x \rightarrow \infty$ . This is perhaps the most basic result in large deviations theory and can be found in textbooks [7] or lecture notes [17]. We often consider limits where the number of measurements tends to zero, and as a result the posterior variance of a Gaussian tends to zero. For this reason, the following alternative writing of this result is more convenient for our purposes.

**Lemma 2.** *Fix constants  $x > 0$  and  $\mu \in \mathbb{R}$ . Let  $X_\sigma \sim N(\mu, \sigma^2)$  for all  $\sigma > 0$ . Then*

$$\lim_{\sigma \rightarrow 0} \sigma^2 \log \mathbb{P}(X_\sigma \geq \mu + x) = -\frac{x^2}{2}.$$

### C.2 Properties of the EI Measure

We provide several properties of the function  $f(x) = x\Phi(x) + \phi(x)$ . The first establishes monotonicity. Then Lemmas 4 and 5 provide upper and lower bounds for  $f(\cdot)$  which help us to compare two EI values.

**Lemma 3.**  *$f(x)$  is positive and increasing on  $\mathbb{R}$ .*

*Proof.* This is true since  $f'(x) = \Phi(x) \geq 0$  and  $\lim_{x \rightarrow -\infty} f(x) = 0$ . □

**Lemma 4.** *For  $x > 0$ ,*

$$f(-x) < \phi(-x).$$

*Proof.* For  $x > 0$ ,  $f(-x) = -x\Phi(-x) + \phi(-x) < \phi(-x)$ . □

**Lemma 5.** *For  $x \geq 2$ ,*

$$f(-x) > \frac{1}{x^3}\phi(-x).$$

*Proof.* Let  $g(x) = \frac{1}{x}[f(-x) - \frac{1}{x^3}\phi(-x)] = -\Phi(-x) + \frac{1}{x}\phi(-x) - \frac{1}{x^4}\phi(-x)$ . We have  $g'(x) = (-x^{-2} + x^{-3} + 4x^{-5})\phi(x) = x^{-5}(-x+2)(x^2+x+2)\phi(x)$ , which implies that  $g(x)$  is decreasing in  $[2, \infty)$ . We notice that  $g(2) > 0$  and  $\lim_{x \rightarrow \infty} g(x) = 0$ , so for  $x \geq 2$ ,  $g(x) > 0$ . Therefore, for  $x \geq 2$ ,  $f(-x) > \frac{1}{x^3}\phi(-x)$ . □

### C.3 Maximal Inequalities for the Observation Noise

In our theoretical analysis, we need a bound on the difference between the empirical mean  $\hat{\mu}_{n,i}$  and the unknown true mean  $\mu_i$  for each arm  $i \in A$  at time  $n$ . Recall the definition

$$W_1 = \max_{n \in \mathbb{N}} \max_{i \in A} \sqrt{\frac{T_{n,i} + 1}{\log(e + T_{n,i})}} \left| \frac{\hat{\mu}_{n,i} - \mu_i}{\sigma} \right|.$$

given in equation (4). The next lemma establishes that the moment generating function for  $W_1$  always exists, which immediately implies bounds on the tails of its distribution function.

To prove this claim, we will use a standard tool in the analysis of bandit algorithms. Imagine writing code to simulate a sampling rule. One way of writing the code waits to see the action  $I_n$  selected by TTEI at time  $n$ , and then generates the corresponding observation  $Y_{n,I_n} \sim N(\mu_{I_n}, \sigma^2)$ . A mathematically equivalent way of simulating the system is to generate a collection of latent independent random variables  $(X_{n,i})_{n \in \mathbb{N}, i \in A}$  where each  $X_{n,i} \sim N(\mu_i, \sigma^2)$ . At time  $n = 0, 1, \dots$ , the algorithm selects an arm  $I_n$ , and observes the real valued response  $X_{T_n, I_n}$ . The proof below works directly with the array of latent variables  $(X_{n,i})_{n \in \mathbb{N}, i \in A}$ , and then deduces implications for  $Y_{n, I_n}$  from this. The notation for  $X_{n,i}$  is important for this result, but not used again in subsequent proofs.

**Lemma 6.** *Under any sampling rule,  $\mathbb{E}[e^{\lambda W_1}] < \infty$  for all  $\lambda > 0$ .*

*Proof.* Recall that  $\hat{\mu}_{n,i} = T_{n,i}^{-1} \sum_{\ell=0}^{n-1} \mathbf{1}\{I_\ell = i\} Y_{\ell, I_\ell}$  and  $T_{n,i} = \sum_{\ell=0}^{n-1} \mathbf{1}\{I_\ell = i\}$ . We took the convention that  $\hat{\mu}_{n,i} = 0$  when  $T_{n,i} = 0$ , so equation (4) is always well defined. Let  $(X_{n,i})_{n \in \mathbb{N}, i \in A}$  be a collection of latent independent random variables where each  $X_{n,i} \sim N(\mu_i, \sigma^2)$ . For all  $i \in A$ , we let  $\hat{X}_{0,i} = 0$ , and for  $n \geq 1$ ,  $\hat{X}_{n,i} = \frac{1}{n} \sum_{\ell=0}^{n-1} X_{\ell,i}$  denote the empirical mean of arm  $i$  before time  $n$ . We will bound

$$\xi_0 \triangleq \max_{n \in \mathbb{N}} \max_{i \in A} \sqrt{\frac{n+1}{\log(e+n)}} \left| \frac{\hat{X}_{n,i} - \mu_i}{\sigma} \right|.$$

When every arm is played infinitely often,  $W_1 = \xi_0$ . One always has  $W_1 \leq \xi_0$ , so it is sufficient to bound  $\mathbb{E}[e^{\lambda \xi_0}]$ . It is also sufficient to bound  $\mathbb{E}[e^{\lambda \xi}]$  where

$$\xi \triangleq \max_{n \geq 1} \max_{i \in A} \sqrt{\frac{n+1}{\log(e+n)}} \left| \frac{\hat{X}_{n,i} - \mu_i}{\sigma} \right|.$$

For all  $n \geq 1$  and  $i \in A$ , we define  $Z_{n,i} \triangleq \sqrt{n} \left( \frac{\hat{X}_{n,i} - \mu_i}{\sigma} \right)$ , and then

$$\xi = \max_{n \geq 1} \max_{i \in A} \sqrt{\frac{n+1}{n \log(e+n)}} |Z_{n,i}|.$$

Each  $Z_{n,i} \sim N(0, 1)$ , and thus by Lemma 1,  $Z_{n,i}$  satisfies the tail bound  $\mathbb{P}(|Z_{n,i}| \geq z) \leq 2e^{-z^2/2}$  for  $z > 0$ . Therefore, for all  $x \geq 2$

$$\begin{aligned} \mathbb{P}(\xi \geq 2x) &= \mathbb{P}\left(\exists n \geq 1, i \in A : |Z_{n,i}| \geq 2\sqrt{\frac{n \log(e+n)}{n+1}} x\right) \\ &\leq k \sum_{n=1}^{\infty} \mathbb{P}\left(|Z_{n,i}| \geq 2\sqrt{\frac{n \log(e+n)}{n+1}} x\right) \\ &\leq 2k \sum_{n=1}^{\infty} \exp\left(-\frac{2n \log(e+n)}{n+1} x^2\right) \\ &\stackrel{(*)}{\leq} 2k \sum_{n=1}^{\infty} \exp\left(-2 \log(e+n) - \frac{n}{n+1} x^2\right) \\ &= 2k \sum_{n=1}^{\infty} \left(\frac{1}{e+n}\right)^2 e^{-\frac{n}{n+1} x^2} \\ &\leq C e^{-x^2/2} \end{aligned}$$

where step  $(*)$  uses the  $ab \geq a + b$  when  $a, b \geq 2$  and  $C = 2k \sum_{n=1}^{\infty} (e + n)^{-2} < \infty$  is a constant. Then for all  $\lambda > 0$ ,

$$\begin{aligned} \mathbb{E}[e^{\lambda \xi}] &= \int_{x=1}^{\infty} \mathbb{P}(e^{\lambda \xi} \geq x) dx \stackrel{(*)}{=} \int_{u=0}^{\infty} \mathbb{P}(e^{\lambda \xi} \geq e^{2\lambda u}) 2\lambda e^{2\lambda u} du \\ &= 2\lambda \int_{u=0}^2 \mathbb{P}(\xi \geq 2u) e^{2\lambda u} du + 2\lambda \int_{u=2}^{\infty} \mathbb{P}(\xi \geq 2u) e^{2\lambda u} du \\ &\leq (e^{4\lambda} - 1) + 2\lambda C \int_{u=2}^{\infty} e^{-u^2/2} \cdot e^{2\lambda u} du < \infty \end{aligned}$$

where in step  $(*)$ , we have substituted  $x = e^{2\lambda u}$ . Hence, for all  $\lambda > 0$ ,  $\mathbb{E}[e^{\lambda W_1}] < \infty$ .  $\square$

This result provides a bound for the difference between the empirical mean of an arm and its true unknown mean. Specifically, for all  $i \in A$  and  $n \in \mathbb{N}$ ,

$$|\hat{\mu}_{n,i} - \mu_i| \leq \sigma W_1 \sqrt{\frac{\log(e + T_{n,i})}{T_{n,i} + 1}}.$$

#### C.4 Maximal Inequalities for the Randomness in the Policy

The previous subsection investigates the accuracy of empirical arm means as a function of the number of times  $T_{n,i}$  it has been sampled. However, since TTEI is a randomized policy, it is often more natural to study the total probability  $\Psi_{n,i}$  the algorithm assigns to measuring arm  $i$  throughout the first  $n$  measurements. We now consider the random variable

$$W_2 = \max_{n \in \mathbb{N}} \max_{i \in A} \frac{|T_{n,i} - \Psi_{n,i}|}{\sqrt{(1 + \Psi_{n,i}/\beta_{\min}) \log(e^2 + \Psi_{n,i}/\beta_{\min})}}.$$

given in equation (5), which captures the maximum relative deviation between  $T_{n,i}$  and  $\Psi_{n,i}$ . As in Lemma 7, we show the moment generating function of  $W_2$  always exists, which immediately implies bounds on the tails of the distribution function of  $W_2$ .

**Lemma 7.** *Under TTEI with parameter  $\beta \in (0, 1)$ ,  $\mathbb{E}[e^{\lambda W_2}] < \infty$  for all  $\lambda > 0$ .*

*Proof.* Similar to the proof of Lemma 6, it suffices to show  $\mathbb{P}(W_2 \geq x) \leq ke^{-x^2/2}$  for all  $x \geq 2$ .

Fix some  $i \in A$ . Define for each  $n \in \mathbb{N}$

$$D_n \triangleq T_{n,i} - \Psi_{n,i} = \sum_{\ell=0}^{n-1} d_{\ell}$$

where

$$d_n \triangleq \mathbf{1}(I_n = i) - \psi_{n,i} = \mathbf{1}(I_n = i) - \mathbb{P}(I_n = i | \mathcal{F}_n).$$

Then  $\mathbb{E}[d_n | \mathcal{F}_n] = 0$  and  $D_n$  is a zero mean martingale. Note  $\psi_{n,i} \in \{0, \beta, 1 - \beta\}$  almost surely, and set

$$X_n \triangleq \mathbf{1}(\psi_{n,i} > 0)$$

to be the indicator that  $i$  is among the top-two at time  $n$ . We can see that  $d_n = X_n d_n$ , and so

$$D_n = \sum_{\ell=0}^{n-1} X_{\ell} d_{\ell}.$$

Here  $\{X_n\}$  is a binary valued process and  $d_n$  is a zero-mean process with increments bounded as  $|d_n| \leq 1$  almost surely. Each  $X_n$  is  $\mathcal{F}_n$  measurable while each  $d_n$  is  $\mathcal{F}_{n+1}$  measurable.

The quadratic variation of  $D_n$  is

$$\langle D \rangle_n = \sum_{\ell=0}^{n-1} \mathbb{E}[X_\ell d_\ell^2 | \mathcal{F}_\ell] = \sum_{\ell=0}^{n-1} X_\ell \beta (1 - \beta),$$

so the magnitude of fluctuation of the martingale  $D_n$  scales with the number of times that arm  $i$  is among the top-two.

There are a number of martingale analogues to the central limit theorem, which suggest that  $D_n = O_P(\sqrt{\langle D \rangle_n})$ . To establish this formally, we apply the theorem of self-normalized martingale processes [23], which bound processes like  $D_n / \sqrt{\langle D \rangle_n}$ . We will apply a result established in [1].

Because  $|d_n| \leq 1$ , applying Hoeffding's Lemma implies

$$\mathbb{E}[e^{\lambda d_n} | \mathcal{F}_n] \leq e^{\lambda^2/2}, \quad \lambda \in \mathbb{R}$$

and so  $d_n$  is 1-sub-Gaussian conditioned on  $\mathcal{F}_n$ . Applying Corollary 8 of [1] implies that for any  $\delta > 0$ , with probability least  $1 - \delta$ ,

$$|D_n| \leq \sqrt{2 \left(1 + \sum_{\ell=0}^{n-1} X_\ell\right) \log \left( \frac{\sqrt{1 + \sum_{\ell=0}^{n-1} X_\ell}}{\delta} \right)}, \quad \forall n \in \mathbb{N}.$$

Analogously, for any  $x \geq 2$  with probability at least  $1 - e^{-x^2/2}$ ,

$$\begin{aligned} |D_n| &\leq \sqrt{2 \left(1 + \sum_{\ell=0}^{n-1} X_\ell\right) \log \left( \frac{\sqrt{1 + \sum_{\ell=0}^{n-1} X_\ell}}{e^{-x^2/2}} \right)} \\ &= \sqrt{\left(1 + \sum_{\ell=0}^{n-1} X_\ell\right) \left( \log \left(1 + \sum_{\ell=0}^{n-1} X_\ell\right) + x^2 \right)} \\ &\leq \sqrt{\left(1 + \sum_{\ell=0}^{n-1} X_\ell\right) \left( \log \left(e^2 + \sum_{\ell=0}^{n-1} X_\ell\right) + x^2 \right)} \\ &\leq \sqrt{\left(1 + \sum_{\ell=0}^{n-1} X_\ell\right) \log \left(e^2 + \sum_{\ell=0}^{n-1} X_\ell\right) x^2} \end{aligned}$$

for all  $n \in \mathbb{N}$ , where the last step uses that  $ab \geq a + b$  for  $a, b \geq 2$ . Then for all  $x \geq 2$

$$\mathbb{P} \left( \max_{n \in \mathbb{N}} \frac{|D_n|}{\sqrt{\left(1 + \sum_{\ell=0}^{n-1} X_\ell\right) \log \left(e^2 + \sum_{\ell=0}^{n-1} X_\ell\right)}} \geq x \right) \leq e^{-x^2/2}$$

Since  $\Psi_{n,i} \geq \beta_{\min} \sum_{\ell=0}^{n-1} X_\ell$ , we have shown that for any  $i$ ,

$$\mathbb{P} \left( \max_{n \in \mathbb{N}} \frac{|T_{n,i} - \Psi_{n,i}|}{\sqrt{(1 + \Psi_{n,i}/\beta_{\min}) \log (e^2 + \Psi_{n,i}/\beta_{\min})}} \geq x \right) \leq e^{-x^2/2}.$$

Taking a union bound over  $i \in A$  implies  $\mathbb{P}(W_2 \geq x) \leq k e^{-x^2/2}$  for any  $x \geq 2$ . □

This result implies that for all  $i \in A$  and  $n \in \mathbb{N}$ ,

$$|T_{n,i} - \Psi_{n,i}| \leq W_2 \sqrt{(1 + \Psi_{n,i}/\beta_{\min}) \log (e^2 + \Psi_{n,i}/\beta_{\min})}.$$



### C.5 A Random Time after which All Means and Sampling Proportions are Accurate

As defined in equation (3),  $M_\beta^\epsilon$  is a time after which the proportion of samples  $T_{n,i}/n$  of any arm  $i$  is within  $\epsilon$  of its ideal proportion  $w_i^\beta$ . We have also defined

$$N_\beta^\epsilon = \inf \left\{ N \in \mathbb{N} : \max_{i \in A} |\hat{\mu}_{n,i} - \mu_i| \leq \epsilon \text{ and } \max_{i \in A} |T_{n,i}/n - w_i^\beta| \leq \epsilon \quad \forall n \geq N \right\},$$

given in equation (6), which is the time after which both the empirical sampling proportion and the empirical mean of each arm is accurate. These two appear to be closely related: for small  $\epsilon$  and  $n \geq M_\beta^\epsilon$  each arm has been sampled  $\Omega(n)$  times, and so we expect the empirical mean is close to the true mean at each arm. Based on this intuition, we obtain the following result.

**Lemma 8.** *Let  $\beta \in (0, 1)$ . Under any sampling rule that satisfies  $\mathbb{E}[M_\beta^\epsilon] < \infty$  for any  $\epsilon > 0$ ,  $\mathbb{E}[N_\beta^\epsilon] < \infty$  for any  $\epsilon > 0$ .*

*Proof.* Fix  $\beta \in (0, 1)$ . Let  $c_\beta = 0.5 \min_{i \in A} w_i^\beta$ . By definition of  $M_\beta^{c_\beta}$ , for all  $n \geq M_\beta^{c_\beta}$  and  $i \in A$ , we have  $T_{n,i}/n \geq w_i^\beta - c_\beta \geq c_\beta$ , and thus  $T_{n,i} \geq nc_\beta$ .

Given  $\epsilon > 0$ . When

$$\frac{T_{n,i} + 1}{\log(e + T_{n,i})} \geq \left( \frac{\sigma W_1}{\epsilon} \right)^2,$$

we have

$$|\hat{\mu}_{n,i} - \mu_i| \leq \sigma W_1 \sqrt{\frac{\log(e + T_{n,i})}{T_{n,i} + 1}} \leq \epsilon.$$

For all  $n \geq M_\beta^{c_\beta} + \lceil 4 + (\sigma W_1/\epsilon)^4 \rceil / c_\beta$  and  $i \in A$ ,

$$T_{n,i} \geq nc_\beta \geq 4 + (\sigma W_1/\epsilon)^4,$$

and thus

$$\frac{T_{n,i} + 1}{\log(e + T_{n,i})} \geq T_{n,i}^{1/2} \geq \left( \frac{\sigma W_1}{\epsilon} \right)^2$$

where the first inequality uses  $\log(e + T_{n,i}) \leq T_{n,i}^{1/2}$  when  $T_{n,i} \geq 4$ .

Hence, for  $n \geq M_\beta^\epsilon + M_\beta^{c_\beta} + \lceil 4 + (\sigma W_1/\epsilon)^4 \rceil / c_\beta$ ,

$$\max_{i \in A} |T_{n,i}/n - w_i^\beta| \leq \epsilon \quad \text{and} \quad \max_{i \in A} |\hat{\mu}_{n,i} - \mu_i| < \epsilon,$$

which implies

$$N_\beta^\epsilon \leq M_\beta^\epsilon + M_\beta^{c_\beta} + \lceil 4 + (\sigma W_1/\epsilon)^4 \rceil / c_\beta.$$

Since  $\mathbb{E}[M_\beta^\epsilon]$  for any  $\epsilon > 0$  and by Lemma 6,  $\mathbb{E}[W_1^4] < \infty$ , we have  $\mathbb{E}[N_\beta^\epsilon] < \infty$  for any  $\epsilon > 0$ .  $\square$

## D Proof of Theorem 2

To simplify the presentation, we introduce the following asymptotic notation. We say two real-valued sequences  $\{a_n\}$  and  $\{b_n\}$  are *logarithmically equivalent* if

$$\lim_{n \rightarrow \infty} \frac{1}{n} \log \left( \frac{a_n}{b_n} \right) = 0.$$

We denote this relation by  $a_n \doteq b_n$ . We can show the following result.

**Lemma 9.**

$$1 - \alpha_{n,1} \doteq \max_{i \neq 1} \mathbb{P}_{\theta \sim \Pi_n} (\theta_i \geq \theta_1).$$

*Proof.* By definition,  $\alpha_{n,1} = \mathbb{P}_{\theta \sim \Pi_n}(\theta_1 > \max_{i \neq 1} \theta_i)$ , and then

$$1 - \alpha_{n,1} = \mathbb{P}_{\theta \sim \Pi_n}(\cup_{i \neq 1} (\theta_i \geq \theta_1)).$$

Hence,

$$\max_{i \neq 1} \mathbb{P}_{\theta \sim \Pi_n}(\theta_i \geq \theta_1) \leq 1 - \alpha_{n,1} \leq \sum_{i \neq 1} \mathbb{P}_{\theta \sim \Pi_n}(\theta_i \geq \theta_1) \leq (k-1) \max_{i \neq 1} \mathbb{P}_{\theta \sim \Pi_n}(\theta_i \geq \theta_1)$$

where the second inequality uses the union bound. Using the squeeze theorem, we have

$$1 - \alpha_{n,1} \doteq \max_{i \neq 1} \mathbb{P}_{\theta \sim \Pi_n}(\theta_i \geq \theta_1).$$

□

For each sample path, we can divide the set of all arms  $A$  into two subsets:

$$\mathcal{I} \triangleq \{i \in A : \lim_{n \rightarrow \infty} T_{n,i} = \infty\} \quad \text{and} \quad \bar{\mathcal{I}} \triangleq A \setminus \mathcal{I}.$$

$\mathcal{I}$  is the set of arms that receive infinite measurement effort. If  $\bar{\mathcal{I}}$  is empty, all arms are sampled infinite times, and we have the following result.

**Lemma 10.** *If  $\bar{\mathcal{I}}$  is empty,*

$$\mathbb{P}_{\theta \sim \Pi_n}(\theta_i \geq \theta_1) \doteq \exp\left(\frac{-(\mu_1 - \mu_i)^2}{2\sigma^2(1/T_{n,1} + 1/T_{n,i})}\right) \quad \forall i \neq 1.$$

*Proof.* Fix  $i \neq 1$ . For  $\theta \sim \Pi_n$ ,  $\theta_i - \theta_1 \sim N(-\Delta_n, \tilde{\sigma}_n^2)$  where we define  $\Delta_n = \mu_{n,1} - \mu_{n,i}$  and

$$\tilde{\sigma}_n^2 = \sigma_{n,i}^2 + \sigma_{n,1}^2 = \frac{1}{1/\sigma_{0,i}^2 + T_{n,i}/\sigma^2} + \frac{1}{1/\sigma_{0,1}^2 + T_{n,1}/\sigma^2}.$$

By hypothesis,  $T_{n,i} \rightarrow \infty$  and  $T_{n,1} \rightarrow \infty$ . This implies  $\Delta_n \rightarrow \mu_1 - \mu_i$  and  $\tilde{\sigma}_n \rightarrow 0$ . Applying Lemma 2 shows

$$\mathbb{P}_{\theta \sim \Pi_n}(\theta_i \geq \theta_1) \doteq \exp(-\Delta_n^2 / 2\tilde{\sigma}_n^2).$$

For any two sequences  $\{a_n\}$  and  $\{b_n\}$ ,  $a_n \doteq b_n$  if  $n^{-1} \log(a_n) - n^{-1} \log(b_n) \rightarrow 0$ . We have

$$\frac{\Delta_n^2}{2\tilde{\sigma}_n^2} = \frac{(\mu_1 - \mu_i)^2}{2\sigma^2(1/T_{n,1} + 1/T_{n,i})} + o(n)$$

since  $T_{n,i} \rightarrow \infty$  and  $T_{n,1} \rightarrow \infty$ , and therefore

$$\exp(-\Delta_n^2 / 2\tilde{\sigma}_n^2) \doteq \exp\left(\frac{-(\mu_1 - \mu_i)^2}{2\sigma^2(1/T_{n,1} + 1/T_{n,i})}\right).$$

□

Now we are ready to prove the theorem.

**Theorem 2** (Posterior Convergence - Sufficient Condition for Optimality). *The following properties hold with probability 1:*

1. *Under any sampling rule that satisfies  $T_{n,i}/n \rightarrow w_i^*$  for each  $i \in A$ ,*

$$\lim_{n \rightarrow \infty} -\frac{1}{n} \log(1 - \alpha_{n,1}) = \Gamma^*. \quad (7)$$

*Under any sampling rule,*

$$\limsup_{n \rightarrow \infty} -\frac{1}{n} \log(1 - \alpha_{n,1}) \leq \Gamma^*. \quad (8)$$

2. Let  $\beta \in (0, 1)$ . Under any sampling rule that satisfies  $T_{n,i}/n \rightarrow w_i^\beta$  for each  $i \in A$ ,

$$\lim_{n \rightarrow \infty} -\frac{1}{n} \log(1 - \alpha_{n,1}) = \Gamma_\beta^*.$$

Under any sampling rule that satisfies  $T_{n,1}/n \rightarrow \beta$ ,

$$\limsup_{n \rightarrow \infty} -\frac{1}{n} \log(1 - \alpha_{n,1}) \leq \Gamma_\beta^*.$$

*Proof.* We begin by establishing the result in equation (8). Recall  $\mathcal{I}$  is the set of arms that are sampled an infinite number of times, and  $\bar{\mathcal{I}}$  is its complement. Suppose first that  $\bar{\mathcal{I}}$  is nonempty. In this case, we show  $\lim_{n \rightarrow \infty} \alpha_{n,1} < 1$ , which implies (8).

For each  $i \in A$ , we define

$$\mu_{\infty,i} \triangleq \lim_{n \rightarrow \infty} \mu_{n,i} \quad \text{and} \quad \sigma_{\infty,i}^2 \triangleq \lim_{n \rightarrow \infty} \sigma_{n,i}^2,$$

so for each  $i \in \mathcal{I}$

$$\mu_{\infty,i} = \mu_i \quad \text{and} \quad \sigma_{\infty,i}^2 = 0,$$

while for each  $i \in \bar{\mathcal{I}}$ ,  $\sigma_{\infty,i}^2 > 0$ .

We let

$$\Pi_\infty \triangleq N(\mu_{\infty,1}, \sigma_{\infty,1}^2) \otimes N(\mu_{\infty,2}, \sigma_{\infty,2}^2) \otimes \cdots \otimes N(\mu_{\infty,k}, \sigma_{\infty,k}^2)$$

denote the limiting posterior distribution, with the understanding that for each  $i \in \mathcal{I}$ ,  $N(\mu_{\infty,i}, \sigma_{\infty,i}^2)$  represents a point mass at the true mean  $\mu_i$ . For each  $i \in A$ , we define

$$\alpha_{\infty,i} \triangleq \mathbb{P}_{\theta \sim \Pi_\infty} \left( \theta_i > \max_{j \neq i} \theta_j \right).$$

Suppose that  $\bar{\mathcal{I}}$  is nonempty. For each  $i \in \bar{\mathcal{I}}$ , since  $\sigma_{\infty,i}^2 > 0$ , we have  $\alpha_{\infty,i} > 0$ , which implies  $\alpha_{\infty,1} < 1$ . Hence,

$$\lim_{n \rightarrow \infty} -\frac{1}{n} \log(1 - \alpha_{n,1}) = \lim_{n \rightarrow \infty} -\frac{1}{n} \log(1 - \alpha_{\infty,1}) = 0.$$

Now suppose that  $\bar{\mathcal{I}}$  is empty. By Lemma 10, we have

$$\begin{aligned} 1 - \alpha_{n,1} &\doteq \max_{i \neq 1} \mathbb{P}_{\theta \sim \Pi_n} (\theta_i \geq \theta_1) \\ &\doteq \max_{i \neq 1} \left\{ \exp \left( \frac{-(\mu_1 - \mu_i)^2}{2\sigma^2(1/T_{n,1} + 1/T_{n,i})} \right) \right\} \\ &\doteq \exp \left( -n \min_{i \neq 1} \left\{ \frac{(\mu_1 - \mu_i)^2}{2\sigma^2(n/T_{n,1} + n/T_{n,i})} \right\} \right) \end{aligned}$$

where the second equality uses the property that if for each  $i = 1, \dots, m$ ,  $a_{n,i} \doteq b_{n,i}$ , then  $\max_{i \in \{1, \dots, m\}} a_{n,i} \doteq \max_{i \in \{1, \dots, m\}} b_{n,i}$ .

Let

$$\Sigma \triangleq \left\{ w = (w_1, \dots, w_k) : \sum_{i=1}^k w_i = 1 \text{ and } w_i \geq 0, \forall i \in A \right\}$$

denote the set of possible proportions allocated to  $k$  arms. Russo [24] showed that

$$\Gamma^* = \max_{w \in \Sigma} \min_{i \neq 1} \frac{(\mu_1 - \mu_i)^2}{2\sigma^2(1/w_1 + 1/w_i)},$$

where the maximizer is  $w^*$ .

Under any sampling rule,

$$\begin{aligned} 1 - \alpha_{n,1} &\doteq \exp \left( -n \min_{i \neq 1} \left\{ \frac{(\mu_1 - \mu_i)^2}{2\sigma^2(n/T_{n,i} + n/T_{n,1})} \right\} \right) \\ &\geq \exp \left( -n \max_{w \in \Sigma} \min_{i \neq 1} \left\{ \frac{(\mu_1 - \mu_i)^2}{2\sigma^2(1/w_i + 1/w_1)} \right\} \right) \\ &= \exp(-n\Gamma^*), \end{aligned}$$

which implies

$$\limsup_{n \rightarrow \infty} -\frac{1}{n} \log(1 - \alpha_{n,1}) \leq \Gamma^*.$$

This completes the proof of (8).

These same calculations can be leveraged to establish (7). Under any sampling rule that satisfies  $T_{n,i}/n \rightarrow w_i^*$  for each  $i \in A$ ,

$$\begin{aligned} 1 - \alpha_{n,1} &\doteq \exp \left( -n \min_{i \neq 1} \left\{ \frac{(\mu_1 - \mu_i)^2}{2\sigma^2(n/T_{n,1} + n/T_{n,i})} \right\} \right) \\ &\doteq \exp \left( -n \min_{i \neq 1} \left\{ \frac{(\mu_1 - \mu_i)^2}{2\sigma^2(1/w_1^* + 1/w_i^*)} \right\} \right) \\ &= \exp(-n\Gamma^*), \end{aligned}$$

and thus

$$\limsup_{n \rightarrow \infty} -\frac{1}{n} \log(1 - \alpha_{n,i}) = \Gamma^*.$$

Given  $\beta \in (0, 1)$ , Russo [24] showed that

$$\Gamma_\beta^* = \max_{w \in \Sigma: w_1 = \beta} \min_{i \neq 1} \frac{(\mu_1 - \mu_i)^2}{2\sigma^2(1/w_1 + 1/w_i)},$$

where the maximizer is  $w^\beta$ . Repeating the same proof given above with minor changes in notation, we can show that under any sampling rule that satisfies  $T_{n,i}/n \rightarrow w_i^\beta$  for each  $i \in A$ ,

$$\lim_{n \rightarrow \infty} -\frac{1}{n} \log(1 - \alpha_{n,1}) = \Gamma_\beta^*,$$

and under any sampling rule that satisfies  $T_{n,1}/n \rightarrow \beta$ , we have

$$\limsup_{n \rightarrow \infty} -\frac{1}{n} \log(1 - \alpha_{n,1}) \leq \Gamma_\beta^*.$$

□

## E Proof of Theorem 3

Intuitively speaking, this theorem works because in the Chernoff's stopping rule, the statistic  $Z_n \approx \Gamma_\beta^* n$  as  $n$  is large and the threshold  $\gamma_{n,\delta}^\alpha = \log(Cn^\alpha/\delta) = \log(1/\delta) + o(n)$ , which implies that the stopping time  $\tau_\delta$  scales as  $\log(1/\delta)/\Gamma_\beta^*$ .

We first recall the statement of Theorem 3.

**Theorem 3** (Fixed Confidence - Sufficient Condition for Optimality). *Let  $\delta, \beta \in (0, 1)$  and  $\alpha > 1$ . Under any sampling rule which, if applied with no stopping rule, satisfies  $\mathbb{E}[M_\beta^\epsilon] < \infty$  for all  $\epsilon > 0$ , using the Chernoff's stopping rule with the threshold  $\gamma_{n,\delta}^\alpha = \log(Cn^\alpha/\delta)$  (where  $C = C(\alpha, k)$ ) guarantees*

$$\limsup_{\delta \rightarrow 0} \frac{\mathbb{E}[\tau_\delta]}{\log(1/\delta)} \leq \frac{1}{\Gamma_\beta^*}.$$

Our proof appeals to the random time  $N_\epsilon^\beta$  defined in equation (6) as

$$N_\epsilon^\beta = \inf \left\{ N \in \mathbb{N} : \max_{i \in A} |\hat{\mu}_{n,i} - \mu_i| \leq \epsilon \text{ and } \max_{i \in A} |T_{n,i}/n - w_i^\beta| \leq \epsilon \quad \forall n \geq N \right\}.$$

Lemma 8 shows that our hypothesis  $\mathbb{E}[M_\beta^\epsilon] < \infty$  for all  $\epsilon > 0$  implies  $\mathbb{E}[N_\beta^\epsilon] < \infty$  for all  $\epsilon > 0$ .

The proof relies on a sequence of lemmas. The first shows that when  $n$  is large, the statistic  $Z_n$  used in the Chernoff's stopping rule is approximately equal to  $\Gamma_\beta^* n$ .

**Lemma 11.** *Fix any  $\zeta > 0$ . Under the conditions of Theorem 3, there exists  $N$  with  $\mathbb{E}[N] < \infty$  such that for all  $n \geq N$ ,  $Z_n \geq (\Gamma_\beta^* - \zeta)n$ .*

*Proof.* Using the formula for KL divergence  $d(x, y) = (x - y)^2 / (2\sigma^2)$ ,

$$Z_n = \min_{i \in A \setminus \{\hat{I}_n^*\}} Z_{n, \hat{I}_n^*, i} = \min_{i \in A \setminus \{\hat{I}_n^*\}} \frac{(\hat{\mu}_{n, \hat{I}_n^*} - \hat{\mu}_{n, i})^2}{2\sigma^2(1/T_{n, \hat{I}_n^*} + 1/T_{n, i})}.$$

By the assumption that the true best arm  $1 = \arg \max_{i \in A} \mu_i$  is unique, we can choose sufficiently small  $\epsilon > 0$  such that  $\hat{I}_n^* = 1$  when  $\max_{i \in A} |\hat{\mu}_{n, i} - \mu_i| \leq \epsilon$ . Hence, for  $n \geq N_\beta^\epsilon$ ,

$$\frac{Z_n}{n} = \min_{i \in A \setminus \{1\}} \frac{(\hat{\mu}_{n, 1} - \hat{\mu}_{n, i})^2}{2\sigma^2(n/T_{n, 1} + n/T_{n, i})}. \quad (9)$$

Since  $\hat{\mu}_{n, 1} - \hat{\mu}_{n, i} \rightarrow \mu_1 - \mu_i$  and  $n/T_{n, 1} + n/T_{n, i} \rightarrow 1/\beta + 1/w_i^\beta$  and the right hand side of equation (9) is continuous at the limit

$$\Gamma_\beta^* = \frac{(\mu_1 - \mu_2)^2}{2\sigma^2(1/\beta + 1/w_2^\beta)} = \dots = \frac{(\mu_1 - \mu_k)^2}{2\sigma^2(1/\beta + 1/w_k^\beta)},$$

there exists a sufficiently small  $\epsilon > 0$  such that when  $\max_{i \in A} |\hat{\mu}_{n, i} - \mu_i| \leq \epsilon$  and  $\max_{i \in A} |T_{n, i}/n - w_i^\beta| \leq \epsilon$ ,  $Z_n/n \geq \Gamma_\beta^* - \zeta$ . We set  $N = N_\beta^\epsilon$ . Then,  $Z_n \geq (\Gamma_\beta^* - \zeta)n$  for all  $n \geq N$  and by Lemma 8,  $\mathbb{E}[N] = \mathbb{E}[N_\beta^\epsilon] < \infty$ .  $\square$

Bounding the first time when  $Z_n > \gamma_{n, \delta}^\alpha$  is made more technically challenging by the fact that the threshold used in the Chernoff's stopping rule grows logarithmically with  $n$ . The next lemma simplifies the proof by lower bounding  $Z_n - \gamma_{n, \delta}^\alpha$  by a term without this logarithmic factor.

**Lemma 12.** Fix any  $\zeta > 0$ . Under the conditions of Theorem 3 there exists  $N$  with  $\mathbb{E}[N] < \infty$  such that for all  $n \geq N$ ,  $Z_n - \gamma_{n, \delta}^\alpha > (\Gamma_\beta^* - 2\zeta)n - \log(C/\delta)$ .

*Proof.* Fix any  $\zeta > 0$ . There exists a deterministic time  $N_1$  such that

$$\gamma_{n, \delta}^\alpha = \log(C/\delta) + \alpha \log(n) < \log(C/\delta) + \zeta n$$

for all  $n \geq N_1$ . By Lemma 11, there is a random time  $N_2$  with  $\mathbb{E}[N_2] < \infty$  such that  $n \geq N_2$  implies  $Z_n \geq (\Gamma_\beta^* - \zeta)n$ . Taking  $N = N_1 + N_2$  implies the result.  $\square$

We now complete the proof of Theorem 3.

*Proof of Theorem 3.* By definition, if  $Z_n - \gamma_{n, \delta}^\alpha > 0$ , then  $\tau_\delta \leq n$ . Fix any  $\zeta \in (0, \Gamma_\beta^*/2)$ , by Lemma 12, there exists  $N$  with  $\mathbb{E}[N] < \infty$  such that

$$Z_n - \gamma_{n, \delta}^\alpha > (\Gamma_\beta^* - 2\zeta)n - \log(C/\delta)$$

for all  $n \geq N$ . Therefore

$$\tau_\delta \leq \max \left\{ N, \frac{\log(C/\delta)}{(\Gamma_\beta^* - 2\zeta)} \right\} \leq N + \frac{\log(C)}{(\Gamma_\beta^* - 2\zeta)} + \frac{\log(1/\delta)}{(\Gamma_\beta^* - 2\zeta)}.$$

Since  $\mathbb{E}[N] < \infty$ , we find

$$\limsup_{\delta \rightarrow 0} \frac{\mathbb{E}[\tau_\delta]}{\log(1/\delta)} \leq \frac{1}{(\Gamma_\beta^* - 2\zeta)}.$$

Since this inequality holds for arbitrarily small  $\zeta > 0$ , it implies  $\limsup_{\delta \rightarrow 0} \frac{\mathbb{E}[\tau_\delta]}{\log(1/\delta)} \leq \frac{1}{\Gamma_\beta^*}$ .  $\square$

## F Results specific to TTEI

In this section, we present theoretical results specific to the proposed TTEI policy. The main challenge is ensuring that  $\mathbb{E}[M_\beta^\epsilon]$  is finite where  $M_\beta^\epsilon$  is the time after which the empirical proportions are  $\epsilon$ -accurate. To do this, we present several results for each sample path (up to a set of measure zero), and show that  $M_\beta^\epsilon$  depends at most polynomially on  $W_1$  and  $W_2$ . By Lemmas 6 and 7, the expected value of polynomials of  $W_1$  and  $W_2$  is finite. This ensures that  $\mathbb{E}[M_\beta^\epsilon]$  is finite, which immediately establishes that TTEI achieves the sufficient conditions for both notions of optimality.

Consistently throughout the proof we make statements like the following: *For all  $\epsilon > 0$ , there exists a time  $N = \text{poly}(W_1, W_2)$  such that for all  $n \geq N$ ,  $\max_{i \in A} |\mu_{n,i} - \mu_i| \leq \epsilon$ .* This means that for arbitrarily small  $\epsilon$ , there is a random time  $N$  after which all means are  $\epsilon$ -accurate. Certainly  $N$  may depend on  $\epsilon$ , as implied by the order in which  $\epsilon$  and  $N$  are chosen. The expression  $N = \text{poly}(W_1, W_2)$  means  $N = O(W_1^{c_1} W_2^{c_2})$  for positive constants  $c_1$  and  $c_2$  where  $(\epsilon, \sigma, k, \mu_1, \dots, \mu_k, \beta)$  are treated as constants. By Lemmas 6 and 7, this is enough to ensure  $\mathbb{E}[N] < \infty$ . Throughout the entire proof, the problem parameters  $(\sigma, k, \mu_1, \dots, \mu_k, \beta)$  are fixed. Keeping with the use of  $n$  to denote a time period, we typically use  $N$  to denote a random time after which an event occurs. We typically use  $S$  to denote a random number of samples required, such as  $T_{n,i} \geq S \implies |\mu_{n,i} - \mu_i| \leq \epsilon$ . We use  $s$  as a related dummy variable.

For notational convenience, we assume that TTEI begins with an improper prior such that for each arm  $i \in A$ ,  $\sigma_{0,i}^2 = \infty$ , and we let each  $\mu_{0,i} = 0$ . Consequently, if  $T_{n,i} = \sum_{\ell=0}^{n-1} \mathbf{1}\{I_\ell = i\} = 0$ ,  $\mu_{n,i} = \mu_{0,i} = 0$  and  $\sigma_{n,i} = \sigma_{1,i} = \infty$ , and if  $T_{n,i} > 0$ ,

$$\mu_{n,i} = \frac{1}{T_{n,i}} \sum_{\ell=0}^{n-1} \mathbf{1}\{I_\ell = i\} Y_{\ell, I_\ell} \quad \text{and} \quad \sigma_{n,i}^2 = \frac{\sigma^2}{T_{n,i}},$$

so the posterior parameters are identical to the frequentist sample mean and variance under the observations collected so far, and thus the arm  $I_n^*$  of highest posterior mean is identical to the arm  $\hat{I}_n^*$  of highest empirical mean, i.e.  $I_n^* = \hat{I}_n^*$ . The difference between these formulas and those under a proper prior wash out rapidly as an arm is sampled, but this choice leads to simpler expression in the proof. In this section, *empirical mean* and *posterior mean* are used interchangeably. Under this improper prior, when  $T_{n,i} = 0$ ,  $\sigma_{n,i}^2 = \infty$ , and we define  $v_{n,i} = \infty$  and  $v_{n,i,j} = \infty$  for  $j \neq i$ . This is the natural definition, owing to the fact that if  $X_\sigma \sim N(\mu, \sigma^2)$ ,  $\mathbb{E}[(X_\sigma - x)^+] \rightarrow \infty$  as  $\sigma \rightarrow \infty$ . Indeed, in the limit as the prior variance  $\sigma_{0,i}^2 \rightarrow \infty$ ,  $v_{0,i} \rightarrow \infty$  and  $v_{0,i,j} \rightarrow \infty$  for  $j \neq i$ .

Finally, rather than use the notation  $v_{n,i}$  and  $v_{n,i,j}$  introduced in Section 3 for the expected-improvement measures, it is more convenient to work with the notation defined here. Set

$$v_{n,i}^{(1)} \triangleq v_{n,i} \quad \forall i \in A$$

to be the expected improvement measure used in identifying the first arm  $I_n^{(1)}$  among the top-two, and

$$v_{n,i}^{(2)} \triangleq v_{n,i, I_n^{(1)}} \quad \forall i \in A$$

to be the second expected improvement measure used in identifying the best alternative  $I_n^{(2)}$ .

### F.1 A Technical Lemma

The following technical lemma is used in the analysis of TTEI to compare two EI values.

**Lemma 13.** *Fix constants  $c_0 > c_1 > 0$  and  $a_0, c_2 > 0$ . Then for any  $a_1, a_2 > 0$ , there exists a  $X = \text{poly}(a_1, a_2)$  such that for all  $x \geq X$ ,*

$$\exp(a_0 x^{c_0} - a_1 x^{c_1}) > a_2 x^{c_2}.$$

*Proof.* There exists  $X_1 = \text{poly}(a_1)$  such that for all  $x \geq X_1$ ,  $a_0 x^{c_0 - c_1} - a_1 > 1$ . In addition, there exists  $X_2 = \text{poly}(a_2)$  such that for all  $x \geq X_2$ ,  $\exp(x^{c_1}) > a_2 x^{c_2}$ . Hence, for all  $x \geq X \triangleq \max\{X_1, X_2\}$ ,

$$\exp(a_0 x^{c_0} - a_1 x^{c_1}) = \exp(x^{c_1} (a_0 x^{c_0 - c_1} - a_1)) \geq \exp(x^{c_1}) > a_2 x^{c_2}.$$

□

## F.2 Sufficient Exploration of All Arms and Concentration of Empirical Means

In this subsection, we first show that when  $n$  is large, every arm is sampled frequently. Then the concentration of each empirical mean can be immediately established by the inequality on the difference between the empirical mean and the unknown true mean in terms of the number of samples.

**Proposition 2.** *There exists  $N = \text{poly}(W_1, W_2)$  such that for all  $n \geq N$ ,*

$$T_{n,i} \geq (n/k)^{1/4}, \quad \forall i \in A.$$

This proposition is established in a sequence of results. The first one shows the relationship between the number of samples allocated to the arm  $I_n^*$  with the largest posterior mean and the top arm  $I_n^{(1)}$  under TTEI. Notice that these two arms could be identical.

**Lemma 14.** *For arms  $I_n^*$  and  $I_n^{(1)}$ ,*

$$T_{n,I_n^*} \geq T_{n,I_n^{(1)}}.$$

*Proof.* We prove this by contradiction. Suppose  $T_{n,I_n^*} < T_{n,I_n^{(1)}}$ . This implies  $I_n^* \neq I_n^{(1)}$  and  $\sigma_{n,I_n^*} > \sigma_{n,I_n^{(1)}}$ . Since  $f(x)$  is positive and increasing, we have

$$v_{n,I_n^*}^{(1)} = \sigma_{n,I_n^*} f(0) > \sigma_{n,I_n^{(1)}} f\left(\frac{\mu_{n,I_n^{(1)}} - \mu_{n,I_n^*}}{\sigma_{n,I_n^{(1)}}}\right) = v_{n,I_n^{(1)}}^{(1)},$$

which contradicts that  $I_n^{(1)}$  has the largest EI value. Therefore,  $T_{n,I_n^*} \geq T_{n,I_n^{(1)}}$ .  $\square$

The next result shows that if arm  $I_n^*$  and some other arm  $i$  are sampled sufficiently, then there is some gap between their empirical means. This result can be used to bound the EI value of arm  $i$  from above.

**Lemma 15.** *There exists  $S = \text{poly}(W_1)$  such that for all  $s \geq S$ , if  $T_{n,I_n^*} \geq s$  and  $T_{n,i} \geq s$  for some  $i \neq I_n^*$ ,*

$$\mu_{n,I_n^*} - \mu_{n,i} \geq \Delta_{\min}/2.$$

*Proof.* If  $T_{n,I_n^*} \geq s$ , then by Lemma 6,

$$|\mu_{n,I_n^*} - \mu_{I_n^*}| \leq \sigma W_1 \sqrt{\frac{\log(e + T_{n,I_n^*})}{T_{n,I_n^*} + 1}} \leq \sigma W_1 \sqrt{\frac{\log(e + s)}{s + 1}}$$

where the last inequality is valid because  $g(x) = \log(e + x)/(x + 1)$  is positive and decreasing on  $(0, \infty)$ . There exists  $S = \text{poly}(W_1)$  such that for all  $s \geq S$ ,

$$\sqrt{\frac{\log(e + s)}{s + 1}} \leq \sqrt{\frac{s^{1/2}}{s + 1}} \leq \frac{\Delta_{\min}}{4\sigma W_1},$$

which leads to

$$|\mu_{n,I_n^*} - \mu_{I_n^*}| \leq \Delta_{\min}/4.$$

Similarly, for all  $s \geq S$ , if  $T_{n,i} \geq s$  for some  $i \neq I_n^*$ ,

$$|\mu_{n,i} - \mu_i| \leq \Delta_{\min}/4.$$

Now we want to show that  $\mu_{I_n^*} > \mu_i$ . We prove this by contradiction. Suppose  $\mu_i \geq \mu_{I_n^*}$ . This implies that  $\mu_i - \mu_{I_n^*} \geq \Delta_{\min}$  since all arm-means are unique. Then we have

$$\mu_{n,i} - \mu_{n,I_n^*} \geq (\mu_i - \Delta_{\min}/4) - (\mu_{I_n^*} + \Delta_{\min}/4) \geq \Delta_{\min}/2,$$

which contradicts the definition of  $I_n^*$ . Hence,  $\mu_{I_n^*} > \mu_i$ , and thus

$$\mu_{n,I_n^*} - \mu_{n,i} \geq (\mu_{I_n^*} - \Delta_{\min}/4) - (\mu_i + \Delta_{\min}/4) \geq \Delta_{\min}/2.$$

$\square$

The next result shows that under a mild condition, if arm  $I_n^{(1)}$  has been sampled sufficiently, then  $I_n^{(1)} = I_n^*$ , the arm with the highest posterior mean. Note that by Lemma 14,  $I_n^*$  has been sampled at least as many times as  $I_n^{(1)}$ . The mild condition of this proof ensures that the number of samples of  $I_n^*$  is not an exponential factor larger than the number of samples of  $I_n^{(1)}$ , which could lead to a contradiction if  $I_n^{(1)} \neq I_n^*$ .

**Lemma 16.** *There exists  $S = \text{poly}(W_1)$  such that for all  $s \geq S$ , when  $n \leq \exp(\Delta_{\min}^2 s / (4\sigma^2))$ , if  $T_{n, I_n^{(1)}} \geq s$ , then  $I_n^{(1)} = I_n^*$ .*

*Proof.*  $T_{n, I_n^{(1)}} \geq s$  is equivalent to  $I_n^{(1)} \in \overline{V_n^s}$ . By Lemma 14,  $T_{n, I_n^*} \geq T_{n, I_n^{(1)}} \geq s$ , which means  $I_n^* \in \overline{V_n^s}$ . We notice that if  $v_{n, I_n^*}^{(1)} > v_{n, i}^{(1)}$  for all  $i \in \overline{V_n^s} \setminus \{I_n^*\}$ , then  $I_n^{(1)} = I_n^*$ .

By Lemma 15, there exists  $S = \text{poly}(W_1)$  such that for all  $s \geq S$ ,  $\mu_{n, I_n^*} - \mu_{n, i} \geq \Delta_{\min}/2$  for each  $i \in \overline{V_n^s} \setminus \{I_n^*\}$ , and thus

$$v_{n, i}^{(1)} = \sigma_{n, i} f\left(\frac{\mu_{n, i} - \mu_{n, I_n^*}}{\sigma_{n, i}}\right) \leq \frac{\sigma}{s^{1/2}} f\left(\frac{-\Delta_{\min} s^{1/2}}{2\sigma}\right) < \frac{\sigma}{\sqrt{2\pi} s^{1/2}} \exp\left(\frac{-\Delta_{\min}^2 s}{8\sigma^2}\right)$$

where the last inequality uses Lemma 4. When  $n \leq \exp(\Delta_{\min}^2 s / (4\sigma^2))$ ,

$$v_{n, I_n^*}^{(1)} = \sigma_{n, I_n^*} f(0) \geq \frac{\sigma}{\sqrt{2\pi} n^{1/2}} \geq \frac{\sigma}{\sqrt{2\pi} s^{1/2}} \exp\left(\frac{-\Delta_{\min}^2 s}{8\sigma^2}\right) > v_{n, i}^{(1)}.$$

This concludes the proof.  $\square$

Now we need to introduce some further notations. Given  $s \geq 0$ , we define two sets for all  $n \in \mathbb{N}$ :

$$U_n^s \triangleq \{i \in A : T_{n, i} < s^{1/2}\}$$

and

$$V_n^s \triangleq \{i \in A : T_{n, i} < s\}.$$

We let  $\overline{U_n^s} \triangleq A \setminus U_n^s$  and  $\overline{V_n^s} \triangleq A \setminus V_n^s$ . It is easy to see the following properties:

1.  $U_n^s \subseteq V_n^s$ .
2.  $U_{n+1}^s \subseteq U_n^s$  and  $V_{n+1}^s \subseteq V_n^s$ .

With these defined sets, we can divide all arms into three sets:  $U_n^s$ ,  $\overline{U_n^s} \setminus \overline{V_n^s}$  and  $\overline{V_n^s}$ . We can view  $U_n^s$  and  $\overline{V_n^s}$  as the set of arms that are not well explored and the set of arms that are well explored. Then we will show that under some condition, if there exists some arm that is not well explored, then it cannot happen that TTEI measures two arms  $I_n^{(1)}$  and  $I_n^{(2)}$  that are both well explored.

**Lemma 17.** *There exists  $S = \text{poly}(W_1)$  such that for all  $s \geq S$ , when  $n \leq \exp(\Delta_{\min}^2 s / (4\sigma^2))$ , if  $U_n^s$  is nonempty,  $I_n^{(1)} \in V_n^s$  or  $I_n^{(2)} \in V_n^s$ .*

*Proof.* We want to argue that if  $I_n^{(1)} \notin V_n^s$ , there exists some arm  $j$  such that  $v_{n, j}^{(2)} > v_{n, i}^{(2)}$  for all  $i \in \overline{V_n^s}$ , which implies  $I_n^{(2)} \notin \overline{V_n^s}$ , and thus  $I_n^{(2)} \in V_n^s$ . By Lemmas 16 and 15, there exists  $S_1 = \text{poly}(W_1)$  such that for all  $s \geq S_1$ , when  $n \leq \exp(\Delta_{\min}^2 s / (4\sigma^2))$ ,  $I_n^{(1)} = I_n^* \in \overline{V_n^s}$ , and for each  $i \in \overline{V_n^s} \setminus \{I_n^{(1)}\}$ ,  $\mu_{n, I_n^{(1)}} - \mu_{n, i} \geq \Delta_{\min}/2$ .

Notice that by definition,  $v_{n, I_n^{(1)}}^{(2)} = 0$ . For each  $i \in \overline{V_n^s} \setminus \{I_n^{(1)}\}$ , we have

$$\sigma_{n, i}^2 + \sigma_{n, I_n^{(1)}}^2 = \frac{\sigma^2}{T_{n, i}} + \frac{\sigma^2}{T_{n, I_n^{(1)}}} \leq \frac{\sigma^2}{s} + \frac{\sigma^2}{s} < \frac{4\sigma^2}{s},$$

which leads to

$$v_{n, i}^{(2)} = \sqrt{\sigma_{n, i}^2 + \sigma_{n, I_n^{(1)}}^2} f\left(\frac{\mu_{n, i} - \mu_{n, I_n^{(1)}}}{\sqrt{\sigma_{n, i}^2 + \sigma_{n, I_n^{(1)}}^2}}\right) < \frac{2\sigma}{s^{1/2}} f\left(\frac{-\Delta_{\min} s^{1/2}}{4\sigma}\right) < \frac{2\sigma}{s^{1/2}} \phi\left(\frac{-\Delta_{\min} s^{1/2}}{4\sigma}\right) \quad (10)$$



where the last inequality uses Lemma 4.

For any  $j \in U_n^s$  (which is possible since  $U_n^s$  is nonempty), we have

$$\begin{aligned}\mu_{n,j} - \mu_{n,I_n^{(1)}} &\geq \mu_j - \sigma W_1 \sqrt{\frac{\log(e + T_{n,j})}{T_{n,j} + 1}} - \mu_{I_n^{(1)}} - \sigma W_1 \sqrt{\frac{\log(e + T_{n,I_n^{(1)}})}{T_{n,I_n^{(1)}} + 1}} \\ &\geq (\mu_j - \mu_{I_n^{(1)}}) - 2\sigma W_1 \sqrt{\frac{\log(e)}{1}} \\ &= (\mu_j - \mu_{I_n^{(1)}}) - 2\sigma W_1 \\ &\geq -\Delta_{\max} - 2\sigma W_1\end{aligned}$$

where  $\Delta_{\max} = \max_{i,j \in A} (\mu_i - \mu_j)$ , and the first inequality uses Lemma 6, and the second inequality is valid because  $g(x) = \log(e + x)/(x + 1)$  is positive and decreasing on  $(0, \infty)$ . In addition,

$$\sigma_{n,j}^2 + \sigma_{n,I_n^{(1)}}^2 \geq \sigma_{n,j}^2 = \frac{\sigma^2}{T_{n,j}} > \frac{\sigma^2}{s^{1/2}}.$$

which leads to

$$v_{n,j}^{(2)} > \frac{\sigma}{s^{1/4}} f\left(\frac{-(\Delta_{\max} + 2\sigma W_1)s^{1/4}}{\sigma}\right).$$

For all  $s \geq S_2 \triangleq (2\sigma/\Delta_{\max})^4$ , we have

$$\frac{(\Delta_{\max} + 2\sigma W_1)s^{1/4}}{\sigma} > \frac{\Delta_{\max}s^{1/4}}{\sigma} \geq 2,$$

and then by Lemma 5,

$$v_{n,j}^{(2)} > \frac{\sigma}{s^{1/4}} f\left(\frac{-(\Delta_{\max} + 2\sigma W_1)s^{1/4}}{\sigma}\right) > \frac{\sigma^4}{s(\Delta_{\max} + 2\sigma W_1)^3} \phi\left(\frac{-(\Delta_{\max} + 2\sigma W_1)s^{1/4}}{\sigma}\right). \quad (11)$$

By Lemma 13, there exists  $S_3 = \text{poly}(W_1)$  such that for all  $s \geq S_3$ , the right hand side of inequality (11) is larger than the right hand side of inequality (10), which implies  $I_n^{(2)} \notin \bar{V}_n^s$ , and thus  $I_n^{(2)} \in V_n^s$ .

Therefore, for  $s \geq S \triangleq \max\{S_1, S_2, S_3\}$ , when  $n \leq \exp(\Delta_{\min}^2 s/(4\sigma^2))$ , if  $U_n^s$  is nonempty  $I_n^{(1)} \in V_n^s$  or  $I_n^{(2)} \in V_n^s$ .  $\square$

With the above lemma, we are ready to show that when  $n$  is large, the set  $U_n^s$  of arms that are not well explored is indeed empty.

**Lemma 18.** *There exists  $S = \text{poly}(W_1, W_2)$  such that for all  $s \geq S$ ,  $U_{\lfloor ks^2 \rfloor}^s$  is empty.*

*Proof.* For notational convenience, we assume  $\lfloor ks^2 \rfloor = ks^2$ .

When  $s$  is large,  $ks^2 \leq \exp(\Delta_{\min}^2 s/(4\sigma^2))$ . Then Lemma 17 implies that there exists  $S_1 = \text{poly}(W_1)$  such that for all  $s \geq S_1$ , when  $n \leq ks^2$ , if  $U_n^s$  is nonempty, then  $I_n^{(1)} \in V_n^s$  or  $I_n^{(2)} \in V_n^s$ . There exists  $S_2 = \text{poly}(W_2)$  such that for all  $s \geq S_2$ ,

$$s^2 \geq ks \quad \text{and} \quad \beta_{\min}s^2 - 2kW_2\sqrt{(1 + ks^2/\beta_{\min})\log(e^2 + ks^2/\beta_{\min})} \geq ks$$

where  $\beta_{\min} = \min\{\beta, 1 - \beta\} > 0$ . The reason to construct the above two inequalities becomes clear in the following analysis.

We consider  $s \geq S \triangleq \max\{S_1, S_2\}$ , and prove the statement by contradiction. Suppose  $U_{ks^2}^s$  is nonempty. Then  $U_0^s \supseteq U_1^s \supseteq \dots \supseteq U_{ks^2-1}^s \supseteq U_{ks^2}^s$  are all nonempty. Since  $U_n^s \subseteq V_n^s$  for all  $n \in \mathbb{N}$ , then we  $V_0^s \supseteq V_1^s \supseteq \dots \supseteq V_{ks^2-1}^s \supseteq V_{ks^2}^s$  are all nonempty. Since  $s^2 \geq ks$ , at least one arm is measured at least  $s$  times before time  $s^2$ , and thus  $|V_{s^2}^s| \leq k - 1$ . Then we want to show that for each  $r = 2, 3, \dots, k$ , at least one arm in  $V_{(r-1)s^2}^s$  is measured at least  $s$  times in periods

$[(r-1)s^2, rs^2 - 1]$ . For each  $\ell \in [(r-1)s^2, rs^2 - 1]$ , since  $U_\ell^s$  is nonempty, by Lemma 17, we have  $I_\ell^{(1)} \in V_\ell^s$  or  $I_\ell^{(2)} \in V_\ell^s$ , and thus

$$\sum_{i \in V_\ell^s} \psi_{\ell,i} = \sum_{i \in V_\ell^s} \mathbb{P}(I_\ell = i | \mathcal{F}_\ell) \geq \beta_{\min},$$

which leads to

$$\sum_{i \in V_{(r-1)s^2}^s} \psi_{\ell,i} \geq \sum_{i \in V_\ell^s} \psi_{\ell,i} \geq \beta_{\min}$$

where we use  $V_{(r-1)s^2}^s \supseteq V_\ell^s$ . Hence, we have

$$\sum_{i \in V_{(r-1)s^2}^s} (\Psi_{rs^2,i} - \Psi_{(r-1)s^2,i}) = \sum_{\ell=(r-1)s^2}^{rs^2-1} \sum_{i \in V_{(r-1)s^2}^s} \psi_{\ell,i} \geq \beta_{\min}s^2.$$

Then by Lemma 7, we have

$$\begin{aligned} & \sum_{i \in V_{(r-1)s^2}^s} (T_{rs^2,i} - T_{(r-1)s^2,i}) \\ & \geq \sum_{i \in V_{(r-1)s^2}^s} \left[ \Psi_{rs^2,i} - W_2 \sqrt{(1 + \Psi_{rs^2,i}/\beta_{\min}) \log(e^2 + \Psi_{rs^2,i}/\beta_{\min})} \right] \\ & \quad - \sum_{i \in V_{(r-1)s^2}^s} \left[ \Psi_{(r-1)s^2,i} + W_2 \sqrt{(1 + \Psi_{(r-1)s^2,i}/\beta_{\min}) \log(e^2 + \Psi_{(r-1)s^2,i}/\beta_{\min})} \right] \\ & \geq \beta_{\min}s^2 - 2kW_2 \sqrt{(1 + ks^2/\beta_{\min}) \log(e^2 + ks^2/\beta_{\min})} \\ & \geq ks \end{aligned}$$

where the second inequality uses  $|V_{(r-1)s^2}^s| \leq k$  and  $\Psi_{(r-1)s^2,i} \leq \Psi_{rs^2,i} \leq \Psi_{ks^2,i} \leq ks^2$  for any  $i \in A$ . Hence, for each  $r = 2, 3, \dots, k$ , at least one arm in  $V_{(r-1)s^2}^s$  is sampled at least  $s$  times in periods  $[(r-1)s^2, rs^2 - 1]$ , which implies  $|V_{rs^2}^s| \leq |V_{(r-1)s^2}^s| - 1$ . Since  $|V_{s^2}^s| \leq k - 1$ , by induction, we have  $|V_{rs^2}^s| \leq k - r$  for each  $r = 1, 2, \dots, k$ . Hence,  $|V_{ks^2}^s| = 0$ , i.e.  $V_{ks^2}^s$  is empty. Since  $U_{ks^2}^s \subseteq V_{ks^2}^s$ ,  $U_{ks^2}^s$  is empty, which contradicts the supposition that  $U_{ks^2}^s$  is nonempty. Therefore, for all  $s \geq S$ ,  $U_{ks^2}^s$  is empty.  $\square$

Now we can complete the proof of Proposition 2.

*Proof of Proposition 2.* By Lemma 18, there exists  $S$  such that for all  $s \geq S$ ,  $U_{[ks^2]}^s$  is empty. Then for all  $n \geq N \triangleq kS^2$ , we have  $\sqrt{n/k} \geq S$ , and thus  $U_n^{\sqrt{n/k}}$  is empty, which means

$$T_{n,i} \geq \left( \sqrt{n/k} \right)^{1/2} = (n/k)^{1/4}, \quad \forall i \in A.$$

$\square$

We have proved that when  $n$  is large, each arm is explored sufficiently often. Then using the bound on the difference between the empirical mean  $\mu_{n,i}$  and the unknown true mean  $\mu_i$  in terms of  $T_{n,i}$ , we can formally show the concentration of  $\mu_{n,i}$  to  $\mu_i$ .

**Proposition 3.** Fix a constant  $\epsilon > 0$ . There exists  $N = \text{poly}(W_1, W_2)$  such that for all  $n \geq N$ ,

$$|\mu_{n,i} - \mu_i| \leq \epsilon, \quad \forall i \in A.$$

*Proof.* By Lemma 6, for all  $i \in A$  and  $n \in \mathbb{N}$ ,

$$|\mu_{n,i} - \mu_i| \leq \sigma W_1 \sqrt{\frac{\log(e + T_{n,i})}{T_{n,i} + 1}}.$$

By Proposition 2, there exists  $N_1 = \text{poly}(W_1, W_2)$  such that for all  $n \geq N_1$ , for all  $i \in A$ ,  $T_{n,i} \geq (n/k)^{1/4}$ , and thus

$$|\mu_{n,i} - \mu_i| \leq \sigma W_1 \sqrt{\frac{\log(e + T_{n,i})}{T_{n,i} + 1}} \leq \sigma W_1 \sqrt{\frac{\log(e + (n/k)^{1/4})}{(n/k)^{1/4} + 1}}$$

where the last inequality uses  $g(x) = \log(e + x)/(x + 1)$  is positive and decreasing on  $(0, \infty)$ . There exists  $N_2 = \text{poly}(W_1)$  such that for all  $n \geq N_2$ ,

$$\sqrt{\frac{\log(e + (n/k)^{1/2})}{(n/k)^{1/2} + 1}} \leq \sqrt{\frac{2(n/k)^{1/4}}{(n/k)^{1/2} + 1}} \leq \frac{\epsilon}{\sigma W_1}.$$

Then for all  $n \geq N \triangleq \max\{N_1, N_2\}$ , we have

$$|\mu_{n,i} - \mu_i| \leq \sigma W_1 \frac{\epsilon}{\sigma W_1} = \epsilon, \quad \forall i \in A.$$

□

Notice that the unknown arm-means are unique, so  $\mu_1 > \mu_2 \dots > \mu_k$ . Using Proposition 3 on sufficiently small  $\epsilon > 0$ , we can show that when  $n$  is large, the empirical means are so accurate that  $\mu_{n,1} > \mu_{n,2} \dots > \mu_{n,k}$ , which means that the arm with the largest posterior mean  $I_n^*$  is arm 1.

### F.3 Tracking the Optimal Asymptotic Proportion allocated to the Best Arm

In this subsection, we show that when the number of arm draws goes large, the empirical proportion allocated to the best arm concentrates to the tuning parameter  $\beta$  used in TTEI. To prove this, we will first show that when  $n$  is large, the arm with the largest EI value  $I_n^{(1)}$  is always arm 1.

**Lemma 19.** *There exists  $N = \text{poly}(W_1, W_2)$  such that for all  $n \geq N$ ,  $I_n^{(1)} = I_n^* = 1$ .*

*Proof.* Using Proposition 3 on  $\epsilon = \Delta_{\min}/4$  (where  $\Delta_{\min} = \min_{i \neq j} |\mu_i - \mu_j| > 0$ ), there exists  $N_1 = \text{poly}(W_1, W_2)$  such that for all  $n \geq N_1$ ,

$$|\mu_{n,i} - \mu_i| \leq \Delta_{\min}/4, \quad \forall i \in A,$$

which implies  $\mu_{n,1} > \mu_{n,2} > \dots > \mu_{n,k}$ , and thus  $I_n^* = 1$ . Then for  $i \neq I_n^*$ , we have

$$\begin{aligned} \mu_{n,I_n^*} - \mu_{n,i} &= \mu_{n,1} - \mu_{n,i} \\ &\geq \mu_1 - \Delta_{\min}/4 - \mu_i - \Delta_{\min}/4 \\ &= (\mu_1 - \mu_i) - \Delta_{\min}/2 \\ &\geq \Delta_{\min}/2. \end{aligned}$$

By Proposition 2, there exists  $N_2 = \text{poly}(W_1, W_2)$  such that for all  $n \geq N_2$ ,  $T_{n,i} \geq (n/k)^{1/4}$  for all  $i \in A$ . Hence, for all  $n \geq \max\{N_1, N_2\}$ , for each  $i \neq I_n^*$ , we have

$$v_{n,i}^{(1)} = \sigma_{n,i} f\left(\frac{\mu_{n,i} - \mu_{n,I_n^*}}{\sigma_{n,i}}\right) \leq \frac{\sigma k^{1/8}}{n^{1/8}} f\left(\frac{-\Delta_{\min} n^{1/8}}{2\sigma k^{1/8}}\right) < \frac{\sigma k^{1/8}}{n^{1/8}} \phi\left(\frac{-\Delta_{\min} n^{1/8}}{2\sigma k^{1/8}}\right) \quad (12)$$

where the last inequalities uses Lemma 4. For arm  $I_n^*$ , we have

$$v_{n,I_n^*}^{(1)} = \sigma_{n,I_n^*} f(0) = \frac{\sigma}{\sqrt{T_{n,I_n^*}}} \phi(0) \geq \frac{\sigma}{n^{1/2}} \phi(0) \quad (13)$$

There exists a deterministic  $N_3$  such that for all  $n \geq N_3$ , the right hand side of inequality (13) is larger than the right hand side of inequality (12). Therefore, for all  $n \geq N \triangleq \max\{N_1, N_2, N_3\}$ ,  $v_{n,I_n^*}^{(1)} > v_{n,i}^{(1)}$  for all  $i \neq I_n^*$ , which leads to  $I_n^{(1)} = I_n^* = 1$ . □

This lemma immediately implies that when  $n$  is large,  $\psi_{n,1} = \mathbb{P}(I_n = 1 | \mathcal{F}_n) = \beta$ , and then we can show the concentration of  $\Psi_{n,i}/n = \sum_{\ell=0}^{n-1} \psi_{\ell,i}/n$  to  $\beta$ .

**Lemma 20.** Fix a constant  $\epsilon > 0$ . There exists  $N = \text{poly}(W_1, W_2)$  such that for all  $n \geq N$ ,

$$\left| \frac{\Psi_{n,1}}{n} - \beta \right| \leq \epsilon.$$

*Proof.* By Lemma 19, there exists  $N_1 = \text{poly}(W_1, W_2)$  such that for all  $n \geq N_1$ , we have  $I_n^{(1)} = 1$ , which leads to  $\psi_{n,1} = \mathbb{P}(I_n = 1 | \mathcal{F}_n) = \beta$ . Then for  $n \geq N_1$ ,

$$\begin{aligned} \frac{\Psi_{n,1}}{n} &= \frac{1}{n} \left( \sum_{\ell=0}^{N_1-1} \psi_{\ell,1} + \sum_{\ell=N_1}^{n-1} \psi_{\ell,1} \right) \\ &\leq \frac{1}{n} [\beta_{\max} N_1 + \beta(n - N_1)] \\ &= \beta + \frac{(\beta_{\max} - \beta)N_1}{n} \end{aligned}$$

where  $\beta_{\max} = \max\{\beta, 1 - \beta\}$ , and

$$\begin{aligned} \frac{\Psi_{n,1}}{n} &= \frac{1}{n} \left( \sum_{\ell=0}^{N_1-1} \psi_{\ell,1} + \sum_{\ell=N_1}^{n-1} \psi_{\ell,1} \right) \\ &\geq \frac{1}{n} \beta(n - N_1) \\ &= \beta - \frac{\beta N_1}{n}. \end{aligned}$$

For all  $n \geq N_2 \triangleq \beta_{\max} N_1 / \epsilon$ , we have  $(\beta_{\max} - \beta)N_1/n < \epsilon$  and  $-\beta N_1/n \geq -\epsilon$ . Therefore, for all  $n \geq N \triangleq \max\{N_1, N_2\}$ , we have  $|\Psi_{n,1}/n - \beta| \leq \epsilon$ .  $\square$

With this result and Lemma 7 which shows that  $T_{n,i}/\Psi_{n,i}$  is close to 1 when  $\Psi_{n,i}$  is large, we are ready to show the concentration of  $T_{n,1}/n$  to  $\beta$ .

**Lemma 21.** Fix a constant  $\epsilon > 0$ . There exists  $N = \text{poly}(W_1, W_2)$  such that for all  $n \geq N$ ,

$$\left| \frac{T_{n,1}}{n} - \beta \right| \leq \epsilon.$$

*Proof.* It suffices to prove this only for fixed  $\epsilon \in (0, \beta]$  since if  $\epsilon > \beta$ , we can let  $N$  be the satisfactory one associated with the constant  $\beta$ . By Lemma 20, there exists  $N_1 = \text{poly}(W_1, W_2)$  such that for all  $n \geq N_1$ ,  $|\Psi_{n,1}/n - \beta| \leq \epsilon/2$ , which implies  $\Psi_{n,1} \geq (\beta - \epsilon/2)n \geq \beta n/2$ . By Lemma 7,

$$|T_{n,1} - \Psi_{n,1}| \leq W_2 \sqrt{(1 + \Psi_{n,i}/\beta_{\min}) \log(e^2 + \Psi_{n,1}/\beta_{\min})}$$

If  $\Psi_{n,1} \geq \beta_{\min}$ , we have  $1 + \Psi_{n,i}/\beta_{\min} \leq 3\Psi_{n,i}/\beta_{\min}$  and  $\log(e^2 + \Psi_{n,i}/\beta_{\min}) \leq 3(\Psi_{n,i}/\beta_{\min})^{1/2}$ , which leads to

$$|T_{n,i} - \Psi_{n,i}| \leq 3W_2(\Psi_{n,i}/\beta_{\min})^{3/4} \leq \frac{3W_2}{\beta_{\min}} \Psi_{n,i}^{3/4}.$$

Then for all  $n \geq N_2 \triangleq \max\{N_1, 2\beta_{\min}/\beta\}$ , we have  $\Psi_{n,1} \geq \beta n/2 \geq \beta_{\min}$ , and thus

$$\left| \frac{T_{n,1}}{\Psi_{n,1}} - 1 \right| \leq \frac{3W_2/\beta_{\min}}{\Psi_{n,i}^{1/4}} \leq \frac{3W_2/\beta_{\min}}{(\beta n/2)^{1/4}} \quad (14)$$

where the second inequality uses  $\Psi_{n,1} \geq \beta n/2$ . There exists  $N_3 = \text{poly}(W_2)$  such that for all  $n \geq N_3$ , the right hand side of inequality (14) is less than  $\epsilon/(2\beta + \epsilon)$ . Hence, for all  $n \geq N \triangleq \max\{N_2, N_3\}$ , we have  $|\Psi_{n,1}/n - \beta| \leq \epsilon/2$  and  $|T_{n,1}/\Psi_{n,1} - 1| < \epsilon/(2\beta + \epsilon)$ , and thus

$$\frac{T_{n,1}}{n} < \left(1 + \frac{\epsilon}{2\beta + \epsilon}\right) \frac{\Psi_{n,1}}{n} \leq \frac{2(\beta + \epsilon)}{2\beta + \epsilon} (\beta + \epsilon/2) = \beta + \epsilon$$

and

$$\frac{T_{n,1}}{n} < \left(1 - \frac{\epsilon}{2\beta + \epsilon}\right) \frac{\Psi_{n,1}}{n} \geq \frac{2\beta}{2\beta + \epsilon} (\beta - \epsilon/2) > \beta - \epsilon,$$

which leads to  $|T_{n,1}/n - \beta| \leq \epsilon$ .  $\square$

#### F.4 Tracking the Optimal Asymptotic Proportions Allocated to Each Arm

We can further show that for each arm, the empirical proportion allocated to it concentrates to the optimal asymptotic proportion when the number of arm draws goes large.

**Proposition 4.** Fix a constant  $\epsilon > 0$ . There exists  $N = \text{poly}(W_1, W_2)$  such that for all  $n \geq N$ ,

$$\left| \frac{T_{n,i}}{n} - w_i^\beta \right| \leq \epsilon, \quad \forall i \in A.$$

This proposition is established in a sequence of results. We first introduce some further notations. For all  $n \in \mathbb{N}$ , we define the under-sampled set:

$$P_n \triangleq \left\{ i \neq 1 : \frac{T_{n,i}}{n} - w_i^\beta < 0 \right\},$$

where  $(w_2^\beta, \dots, w_k^\beta)$ , defined in equation (2) in Section 4, are the optimal asymptotic proportions of effort allocated to each suboptimal arms. In addition, given  $\epsilon > 0$ , we define the over-sampled set for all  $n \in \mathbb{N}$ :

$$O_n^\epsilon \triangleq \left\{ i \neq 1 : \frac{T_{n,i}}{n} - w_i^\beta > \epsilon \right\}.$$

We have shown that when  $n$  is large, the empirical proportion allocated to the best arm is accurate, then intuitively speaking, if there is an suboptimal arm that is over-sampled, there should be an suboptimal arm that is under-sampled. Specifically, we have the following result.

**Lemma 22.** Fix a constant  $\epsilon > 0$ . There exists  $N = \text{poly}(W_1, W_2)$  such that for all  $n \geq N$ , if  $O_n^\epsilon$  is nonempty, then  $P_n$  is nonempty.

*Proof.* By Lemma 21, there exists  $N = \text{poly}(W_1, W_2)$  such that for all  $n \geq N$ ,  $|T_{n,1}/n - \beta| \leq \epsilon$ , which implies  $T_{n,1} \geq \beta - \epsilon$ . Then we prove this by contradiction. Suppose  $P_n$  is empty. For all  $i \neq 1$ , we have  $T_{n,i}/n \geq w_i^\beta$ . Since  $O_n^\epsilon$  is nonempty, there exists  $j \neq 1$  such that  $T_{n,j}/n > w_j^\beta + \epsilon$ . Then we have

$$\begin{aligned} \sum_{i \in A} T_{n,i}/n &= T_{n,1}/n + T_{n,j}/n + \sum_{i \neq 1, j} T_{n,i}/n \\ &> \beta - \epsilon + w_j^\beta + \epsilon + \sum_{i \neq 1, j} w_i^\beta \\ &= \sum_{i \in A} w_i^\beta = 1, \end{aligned}$$

which leads to a contradiction. Hence,  $P_n$  is nonempty.  $\square$

Next we will show that when  $n$  is large, the best alternative  $I_n^{(2)}$  is not from the over-sampled set, or equivalently, for any arm  $i$  that is over-sampled, it could not be the best alternative  $I_n^{(2)}$ .

**Lemma 23.** Fix a constant  $\epsilon > 0$ . There exists  $N = \text{poly}(W_1, W_2)$  such that for all  $n \geq N$ ,  $I_n^{(2)} \notin O_n^\epsilon$ .

*Proof.* We want to argue that when  $n$  is sufficiently large, if  $O_n^\epsilon$  is nonempty, there exists some arm  $j$  such that  $v_{n,j}^{(2)} > v_{n,i}^{(2)}$  for all  $i \in O_n^\epsilon$ , which implies  $I_n^{(2)} \notin O_n^\epsilon$ . By Lemma 19, there exists  $N_1 = \text{poly}(W_1, W_2)$  such that for  $n \geq N_2$ ,  $I_n^{(1)} = I_n^* = 1$ . Then for  $i \neq 1$ ,

$$v_{n,i}^{(2)} = \sqrt{\sigma_{n,i}^2 + \sigma_{n,1}^2} f \left( \frac{\mu_{n,i} - \mu_{n,1}}{\sqrt{\sigma_{n,i}^2 + \sigma_{n,1}^2}} \right).$$

where  $\alpha_{n,i}^2 = \sigma^2/T_{n,i}$  and  $\alpha_{n,1}^2 = \sigma^2/T_{n,1}$ . By Lemma 22, there exists  $N_2 = \text{poly}(W_1, W_2)$  such that for all  $n \geq N_1$ , if  $O_n^\epsilon$  is nonempty,  $P_n$  is nonempty. We will show that when  $n$  is sufficiently

large, for all  $i \in O_n^\epsilon$  and  $j \in P_n$ ,  $v_{n,j}^{(2)} > v_{n,i}^{(2)}$ . By Proposition 3 and Lemma 21, for any  $\zeta > 0$ , there exists  $N_3 = \text{poly}(W_1, W_2)$  (that depends on  $\zeta$ ) such that for all  $n \geq N_3$ ,  $|\mu_{n,i} - \mu_i| < \zeta$  for each  $i \in A$  and  $|T_{n,1}/n - \beta| \leq \zeta$ . We let  $\zeta$  be sufficiently small such that  $T_{n,1} \geq (\beta - \zeta)n > 0$  and  $\mu_{n,i} - \mu_{n,1} \leq \mu_i - \mu_1 + 2\zeta < 0$  for each  $i \neq 1$ . Then for  $i \in O_n^\epsilon$ , we have  $T_{n,i} > (w_i^\beta + \epsilon)n$ , and thus

$$v_{n,i}^{(2)} < \sigma \left( \frac{1}{w_i^\beta + \epsilon} + \frac{1}{\beta - \zeta} \right)^{1/2} n^{-1/2} \phi \left( \frac{(\mu_i - \mu_1 + 2\zeta)n^{1/2}}{\sigma \left[ 1/(w_i^\beta + \epsilon) + 1/(\beta - \zeta) \right]^{1/2}} \right)$$

where Lemma 4 is used. For  $j \in P_n$ , we have  $T_{n,j} < w_j^\beta n$ , and thus

$$\begin{aligned} v_{n,j}^{(2)} &> \sigma \left( \frac{1}{w_j^\beta} + \frac{1}{\beta + \zeta} \right)^{1/2} n^{-1/2} f \left( \frac{(\mu_j - \mu_1 - 2\zeta)n^{1/2}}{\sigma \left[ 1/w_j^\beta + 1/(\beta + \zeta) \right]^{1/2}} \right) \\ &> \sigma^4 \left( \frac{1}{w_j^\beta} + \frac{1}{\beta + \zeta} \right)^2 (-\mu_j + \mu_1 + 2\zeta)^{-3} n^{-2} \phi \left( \frac{(\mu_j - \mu_1 - 2\zeta)n^{1/2}}{\sigma \left[ 1/w_j^\beta + 1/(\beta + \zeta) \right]^{1/2}} \right) \end{aligned}$$

where Lemma 5 is used in the last inequality for all  $n \geq N_4$  such that the value taken by  $f$  is less than  $-2$ .

Now we need to define some further notations to compare the above two EI values. For any  $i, j \neq 1$ , as  $x \rightarrow 0$ ,

$$g_{i,j}(x) \triangleq \frac{(\mu_i - \mu_1 + 2x)^2}{1/(w_i^\beta + \epsilon) + 1/(\beta - x)} - \frac{(\mu_j - \mu_1 - 2x)^2}{1/w_j^\beta + 1/(\beta + x)}$$

is continuous at the limit

$$C_{i,j} \triangleq \frac{(\mu_i - \mu_1)^2}{1/(w_i^\beta + \epsilon) + 1/\beta} - \frac{(\mu_j - \mu_1)^2}{1/w_j^\beta + 1/\beta},$$

where  $\epsilon > 0$  is fixed, and we let

$$C_{\min} \triangleq \min_{i,j \neq 1} C_{i,j}.$$

Since

$$\frac{(\mu_2 - \mu_1)^2}{1/w_2^\beta + 1/\beta} = \dots = \frac{(\mu_k - \mu_1)^2}{1/w_k^\beta + 1/\beta},$$

we have  $C_{i,j} > 0$  for any  $i, j \neq 1$ , and thus  $C_{\min} > 0$ . Clearly, there exists sufficiently small  $\tilde{x} > 0$  such that for any  $i, j \neq 1$ ,

$$g_{i,j}(\zeta) \geq C_{\min}/2,$$

and we let  $\zeta = \tilde{x}$ . Next we define

$$D_{i,j} \triangleq \frac{\sigma^3 \left[ 1/w_j^\beta + 1/(\beta + \zeta) \right]^2 (-\mu_j + \mu_1 + 2\zeta)^{-3}}{\left[ 1/(w_i^\beta + \epsilon) + 1/(\beta - \zeta) \right]^{1/2}}$$

for any  $i, j \neq 1$ , and we let

$$D_{\min} \triangleq \min_{i,j \neq 1} D_{i,j}.$$

With these notations, we know that for all  $n \geq N_5 \triangleq \max\{N_1, N_2, N_3, N_4\}$ , for all  $i \in O_n^\epsilon$  and  $j \in P_n$ ,

$$\frac{v_{n,j}^{(2)}}{v_{n,i}^{(2)}} > D_{i,j} n^{-3/2} \exp \left( \frac{C_{\min} n}{4\sigma^2} \right) \geq D_{\min} n^{-3/2} \exp \left( \frac{C_{\min} n}{4\sigma^2} \right). \quad (15)$$

There exists  $N_6$  such that for all  $n \geq N_6$ , the right hand side of inequality (15) is greater than 1, which is  $v_{n,j}^{(2)} > v_{n,i}^{(2)}$ . There, for  $n \geq N \triangleq \max\{N_5, N_6\}$ ,  $v_{n,j}^{(2)} > v_{n,i}^{(2)}$  for all  $i \in O_n^\epsilon$  and  $j \in P_n$ , which implies  $I_n^{(2)} \notin O_n^\epsilon$ .  $\square$

The above result and Lemma 19 together shows that when  $n$  is large, for any arm  $i \neq 1$  that is over-sampled,  $I_n^{(2)} \neq i$  and  $I_n^{(1)} = 1 \neq i$ , which means that arm  $i$  is not sampled at time  $n$ . Next we are going to show that indeed, there is no over-sampled arm when  $n$  is sufficiently large.

**Lemma 24.** *Fix a constant  $\epsilon > 0$ . There exists  $N = \text{poly}(W_1, W_2)$  such that for all  $n \geq N$ ,  $O_n^\epsilon$  is empty.*

*Proof.* By Lemma 19, there exists  $N_1$  such that for all  $n \geq N_1$ ,  $I_n^{(1)} = 1$ . By Lemma 23, there exists  $N_2 = \text{poly}(W_1, W_2)$  such that for all  $n \geq N_2$ , if  $O_n^{\epsilon/2}$  is nonempty, then  $I_n^{(2)} \notin O_n^{\epsilon/2}$ . Let  $M \triangleq \max\{N_1, N_2, 2/\epsilon\}$ . Without loss of generality, we assume  $M \in \mathbb{N}$  for notational convenience.

For any  $i \notin O_M^{\epsilon/2}$  such that  $i \neq 1$ , we want to prove by induction that for all  $n \geq M$ ,  $T_{n,i}/n - w_i^\beta \leq \epsilon$ , i.e.  $i \notin O_n^\epsilon$ . By definition,  $T_{M,i}/M - w_i^\beta \leq \epsilon/2 < \epsilon$ . Suppose that for a fixed  $n \geq M$ ,  $T_{n,i}/n - w_i^\beta \leq \epsilon$ . We want to show that  $T_{n+1,i}/(n+1) - w_i^\beta \leq \epsilon$ . There are two situations. If  $T_{n,i}/n - w_i^\beta \leq \epsilon/2$ , then

$$\frac{T_{n+1,i}}{n+1} - w_i^\beta < \frac{1 + T_{n,i}}{n} - w_i^\beta \leq 1/n + \epsilon/2 \leq \epsilon$$

where the last inequality uses  $n \geq M \geq 2/\epsilon$ . On the other hand, if  $\epsilon/2 < T_{n,i}/n - w_i^\beta \leq \epsilon$ , then by Lemma 23,  $I_n^{(2)} \neq i$ , and we also have  $I_n^{(1)} = 1 \neq i$ . Hence,

$$\frac{T_{n+1,i}}{n+1} - w_i^\beta = \frac{T_{n,i}}{n+1} - w_i^\beta \leq \frac{T_{n,i}}{n} - w_i^\beta \leq \epsilon.$$

Combining these two situation, we have  $T_{n+1,i}/(n+1) - w_i^\beta \leq \epsilon$ . Therefore, by induction, for all  $n \geq M$ ,  $T_{n,i}/n - w_i^\beta \leq \epsilon$ , i.e.  $i \notin O_n^\epsilon$ .

For any  $i \in O_M^{\epsilon/2}$ , if we can find  $M_i \geq M$  such that  $i \notin O_{M_i}^{\epsilon/2}$  is empty, then same as the proof above, we can show that for all  $n \geq M_i$ ,  $T_{n,i}/n - w_i^\beta \leq \epsilon$ , i.e.  $i \notin O_n^\epsilon$ . By definition,  $T_{M,i}/M - w_i^\beta > \epsilon/2$ . Notice that for all  $n \geq M$ ,  $I_n^{(1)} = 1 \neq i$  and by Lemma 23, if  $T_{n,i}/n - w_i^\beta > \epsilon/2$ ,  $I_n^{(2)} \neq i$ . Hence, arm  $i$  is not sampled until the empirical proportion allocated to it is less than or equal to  $w_i^\beta + \epsilon/2$ . There exists  $M_i$  such that for all  $n \in [M, M_i - 1]$ ,

$$\frac{T_{n,i}}{n} - w_i^\beta = \frac{T_{M,i}}{n} - w_i^\beta > \epsilon/2$$

and

$$\frac{T_{M_i,i}}{M_i} - w_i^\beta \leq \epsilon/2,$$

which is  $i \notin O_{M_i}^{\epsilon/2}$ . Hence, for all  $n \geq M_i$ ,  $i \notin O_n^\epsilon$ .

Let  $N = M / \min_{j \in A} w_j^\beta$ . Without loss of generality, we assume  $N \in \mathbb{N}$  for notational convenience. Now we want to prove that each  $M_i \leq N$ . Suppose  $M_i \geq N + 1$ . Then  $N \in [M, M_i - 1]$ , so

$$\frac{T_{N,i}}{N} - w_i^\beta = \frac{T_{M,i}}{N} - w_i^\beta > \epsilon/2$$

However, we also have

$$\frac{T_{N,i}}{N} - w_i^\beta = \frac{T_{M,i}}{N} - w_i^\beta \leq \frac{M}{N} - w_i^\beta = \min_{j \in A} w_j^\beta - w_i \leq 0,$$

which leads to a contradiction. Hence,  $M_i \leq N$ .

Since  $M = \text{poly}(W_1, W_2)$ ,  $N = M / \min_{j \in A} w_j^\beta = \text{poly}(W_1, W_2)$ , and for all  $n \geq N$ ,  $i \notin O_n^\epsilon$  for all  $i \neq 1$ , which means  $O_n^\epsilon$  is empty.  $\square$

We can further show that when  $n$  is large, the under-sampled set is also empty, which immediately establishes Proposition 4.

*Proof of Proposition 4.* By Lemmas 21 and 24, there exists  $N = \text{poly}(W_1, W_2)$  such that for all  $n \geq N$ ,

$$|T_{n,1}/n - w_1^\beta| \leq \epsilon/k \quad \text{and} \quad T_{n,i}/n - w_i^\beta \leq \epsilon/k, \quad \forall i \neq 1$$

where  $w_1^\beta = \beta$ . Suppose there exists  $j \in A$  such that  $T_{n,j}/n - w_j^\beta < -\epsilon$ . Then

$$\begin{aligned} \sum_{i \in A} T_{n,i}/n &= T_{n,j}/n + \sum_{i \neq j} T_{n,i}/n \\ &< w_j^\beta - \epsilon + \sum_{i \neq j} (w_i^\beta + \epsilon/k) \\ &= \sum_{i \in A} w_i^\beta - \epsilon/k = 1 - \epsilon/k, \end{aligned}$$

which contradicts  $\sum_{i \in A} T_{n,i}/n = 1$ . Hence, for all  $n \geq N$ , we also have

$$T_{n,i}/n - w_i^\beta \geq -\epsilon, \quad \forall i \in A.$$

This concludes the proof.  $\square$

### F.5 Proof of Theorem 1

Based on Proposition 4, Theorem 1 can be immediately established.

**Theorem 1.** Under TTEI with parameter  $\beta \in (0, 1)$ ,  $\mathbb{E}[M_\beta^\epsilon] < \infty$  for any  $\epsilon > 0$ .

*Proof.* For any  $\epsilon > 0$ ,

$$M_\beta^\epsilon = \inf \left\{ N \in \mathbb{N} : \max_{i \in A} |T_{n,i}/n - w_i^\beta| \leq \epsilon \quad \forall n \geq N \right\}.$$

By Proposition 4, there exists  $N = \text{poly}(W_1, W_2)$  such that for all  $n \geq N$ ,  $\max_{i \in A} |T_{n,i}/n - w_i^\beta| \leq \epsilon$ , which implies  $M_\beta^\epsilon \leq N$ . By Lemmas 6 and 7, we have  $\mathbb{E}[e^{\lambda W_1}] < \infty$  and  $\mathbb{E}[e^{\lambda W_2}] < \infty$  for all  $\lambda > 0$ , which implies  $\mathbb{E}[\text{poly}(W_1, W_2)] < \infty$ . Therefore,  $\mathbb{E}[M_\beta^\epsilon] \leq \mathbb{E}[N] < \infty$ .  $\square$
